# Supplementary material for: Synthesis, photophysical and photovoltaic properties of a new class of two-dimensional conjugated polymers containing donor–acceptor chromophores as pendant groups
Source: Royal Society of Chemistry journal article supplement (doi:10.1039/c3py00168g), 2013-01-01
Supplement: c3py00168g.pdf [file c3py00168g.pdf]

# **Synthesis and Photophysical and Photovoltaic Properties of a New Class of Two-dimensional Conjugated Polymers Containing Donor-Acceptor chromophore as pendant groups**

Yu-Ying Lai, Yen-Ju Cheng,\* Chiu-Hisang Chen, Sheng-Wen Cheng, Fong-Yi Cao, and Chain-Shu Hsu\*

Department of Applied Chemistry, National Chiao Tung University, 1001 Ta Hseuh Road, Hsin-Chu, 30010  
Taiwan.

E-mail: yjcheng@mail.nctu.edu.tw; cshsu@mail.nctu.edu.tw

## Supporting Information

### **Table of Contents**

|                          |    |
|--------------------------|----|
| 1. Computational Details | 2  |
| 2. NMR and Mass Spectra  | 24 |
| 3. Reference             | 39 |

## 1. Computational Details

Quantum-chemical calculations were performed with the Gaussian09 suite<sup>1</sup> employing the B3LYP density functional in combination with the 6-311G(d,p) basis set. Geometry optimizations were performed with solvation in toluene by applying the polarized continuum model (PCM) and with tight SCF and convergence criteria and an ultrafine integration grid by applying the GEDIIS optimization algorithm. The minimum nature of each stationary point was confirmed by a frequency analysis. Time-dependent density functional (TDDFT) calculations were performed including the keyword IOP(9/40=2) in order to output information on smaller contributions to each electronic transition. Electron density difference maps for electronic transitions were generated from TDDFT output by GaussSum 2.2 and visualized by GaussView 5.0. The electronic transitions can therefore be visualized through EDDMs. Red indicates a decrease in charge density, while green indicates an increase. Considering an insignificant effect on electronic properties, all the side-chain substituents were replaced with methyl groups for simplicity.

**Cartesian coordinates (Å) and energies (Hartree) of the Gaussian B3LYP/6-311G(d,p) optimized structures**

**DOATP**

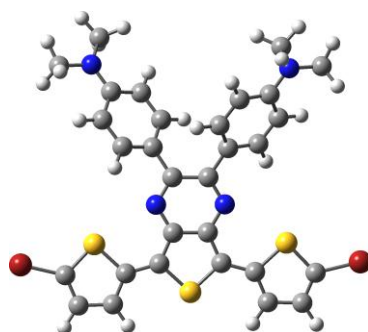

**E= -7719.87186660 ( $N_{\text{img}} = 0$ )**

|   |                 |                 |                 |
|---|-----------------|-----------------|-----------------|
| C | 0.713711495394  | -1.411402279363 | -0.054409467133 |
| C | -0.713608209058 | -1.411469583551 | 0.054258457140  |
| N | -1.412014059654 | -0.248975651886 | 0.034872960778  |
| C | -0.738430843139 | 0.881604474845  | -0.026944665756 |
| C | 0.738324114041  | 0.881671292675  | 0.026872750277  |
| N | 1.412010975049  | -0.248845045258 | -0.034983439161 |
| C | 1.275867802958  | -2.686376687160 | -0.103104582315 |
| C | -1.275647660380 | -2.686497245123 | 0.102910192321  |
| C | 1.545904004177  | 2.108099088738  | 0.193917865901  |
| C | 1.171100890447  | 3.153251234876  | 1.051906084563  |
| C | 1.991958875771  | 4.247614069810  | 1.268265643088  |
| C | 3.238352899895  | 4.371407024448  | 0.609392954816  |
| C | 3.620648774579  | 3.308797592362  | -0.245068234739 |
| H | 4.569024607337  | 3.338193184400  | -0.762835414375 |
| C | -1.546123486790 | 2.107964341690  | -0.193943551171 |
| C | -2.798938206186 | 2.210920363106  | 0.431088306117  |
| C | -3.620979096980 | 3.308454922845  | 0.245087949995  |
| C | -3.238781576189 | 4.371131534758  | -0.609333553406 |
| C | -1.992376456025 | 4.247478027066  | -1.268211544517 |
| H | -1.662619189179 | 5.008781489018  | -1.960810362789 |

|    |                 |                 |                 |
|----|-----------------|-----------------|-----------------|
| C  | -1.171417371722 | 3.153182898816  | -1.051893289924 |
| C  | 2.798709425003  | 2.211194000877  | -0.431109756693 |
| H  | 3.126449251429  | 1.407771009751  | -1.079235923051 |
| H  | 1.662131638938  | 5.008860487372  | 1.960893830750  |
| H  | 0.229813411032  | 3.103137474934  | 1.584473303714  |
| H  | -0.230125587484 | 3.103175940607  | -1.584462866402 |
| H  | -3.126603994985 | 1.407442571420  | 1.079184003259  |
| H  | -4.569358331835 | 3.337742384156  | 0.762854982879  |
| C  | 2.657313271415  | -3.068993794829 | -0.191384774292 |
| C  | 3.187677347150  | -4.340312834739 | -0.289268855790 |
| C  | 4.603504258409  | -4.377149051040 | -0.349960507823 |
| C  | 5.144924053904  | -3.125421052236 | -0.299759820836 |
| C  | -2.657058018524 | -3.069244080579 | 0.191179034190  |
| C  | -3.187305204540 | -4.340615039819 | 0.289022283249  |
| C  | -4.603128725673 | -4.377583467564 | 0.349712670050  |
| C  | -5.144663666480 | -3.125903688190 | 0.299551899338  |
| S  | 3.948804783898  | -1.866268550615 | -0.174020694367 |
| S  | -3.948660190752 | -1.866637089672 | 0.173853722317  |
| H  | -5.186503746308 | -5.283850464864 | 0.429388973377  |
| H  | -2.574404665219 | -5.232150023566 | 0.320213771108  |
| H  | 2.574858807707  | -5.231903192025 | -0.320488718508 |
| H  | 5.186962622446  | -5.283359845399 | -0.429665717877 |
| Br | 6.984603142421  | -2.687318515560 | -0.357455053475 |
| Br | -6.984383015707 | -2.687972241208 | 0.357261462898  |
| N  | 4.041479297713  | 5.476023113229  | 0.787874401961  |
| N  | -4.042009154177 | 5.475680692761  | -0.787774399629 |
| C  | 5.385271372717  | 5.496376339811  | 0.228869627929  |
| H  | 5.843548516738  | 6.460429720852  | 0.442403686669  |
| H  | 6.026904113568  | 4.709932458846  | 0.648554899061  |
| H  | 5.363782555878  | 5.373557062337  | -0.858149379640 |
| C  | 3.688223941641  | 6.479213756212  | 1.781020168063  |

|   |                 |                 |                 |
|---|-----------------|-----------------|-----------------|
| H | 2.698947044331  | 6.901554920243  | 1.581109516419  |
| H | 3.687548244251  | 6.077563382782  | 2.803543967952  |
| H | 4.409673175955  | 7.293109424690  | 1.735326997074  |
| C | -5.385797326580 | 5.495897841898  | -0.228755716175 |
| H | -5.844152537512 | 6.459926713360  | -0.442233294298 |
| H | -6.027373100297 | 4.709425487379  | -0.648475374292 |
| H | -5.364286663971 | 5.373023144197  | 0.858256263453  |
| C | -3.688854937590 | 6.478929311680  | -1.780897885997 |
| H | -4.410391264383 | 7.292746961771  | -1.735192427999 |
| H | -2.699623600916 | 6.901371922283  | -1.580974697220 |
| H | -3.688131937339 | 6.077298850737  | -2.803429248908 |
| S | 0.000164493865  | -3.878331794103 | -0.000119884554 |

**DEHTP**

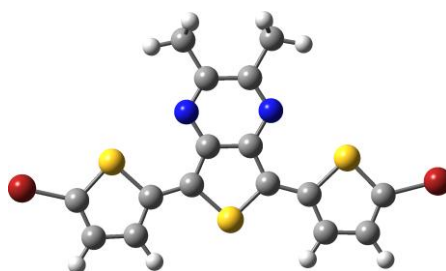

**E= -7068.30667434 ( $N_{img} = 0$ )**

|   |                 |                 |                 |
|---|-----------------|-----------------|-----------------|
| C | -1.159473861922 | 0.479771583859  | -0.688307424203 |
| C | 0.272040676571  | 0.442451258588  | -0.711267492560 |
| N | 1.005280316870  | 1.590395961689  | -0.723275004260 |
| C | 0.346736680933  | 2.721920370583  | -0.712946951274 |
| C | -1.115341134034 | 2.760037479667  | -0.689489501038 |
| N | -1.831926550297 | 1.664363387813  | -0.677763779898 |
| C | -1.757103943569 | -0.779575315092 | -0.678456447642 |
| C | 0.803265538542  | -0.846325504193 | -0.719519909590 |
| C | -3.150941797411 | -1.129870404774 | -0.656022931269 |
| C | -3.712472585289 | -2.391285429656 | -0.646744319025 |

|    |                 |                 |                 |
|----|-----------------|-----------------|-----------------|
| C  | -5.129495208986 | -2.397061191761 | -0.624006499728 |
| C  | -5.640816411804 | -1.131473172111 | -0.616068584763 |
| C  | 2.176965365306  | -1.268771848105 | -0.741472799913 |
| C  | 2.672032075501  | -2.557732991732 | -0.749154766263 |
| C  | 4.086829815956  | -2.637335870742 | -0.771831271377 |
| C  | 4.663375802846  | -1.400109133884 | -0.781325838088 |
| S  | -4.413430984085 | 0.102183046236  | -0.636046630440 |
| S  | 3.501912384582  | -0.104174267468 | -0.762959222202 |
| H  | 4.645388362872  | -3.562387763861 | -0.780604881932 |
| H  | 2.035406631998  | -3.432979883058 | -0.738768082807 |
| H  | -3.122299417660 | -3.298515606817 | -0.656015787356 |
| H  | -5.735477107336 | -3.291752863030 | -0.614087877607 |
| Br | -7.469386145338 | -0.651792011835 | -0.586820093982 |
| Br | 6.514447344903  | -1.016358278664 | -0.811093264563 |
| C  | -1.840108940024 | 4.076740589557  | -0.678133234408 |
| H  | -1.565360822272 | 4.673688586477  | 0.197097704257  |
| H  | -1.593545761634 | 4.673351339155  | -1.561945321230 |
| H  | -2.914040633890 | 3.898808467889  | -0.660890015950 |
| C  | 1.139101359362  | 3.999071033829  | -0.725939129434 |
| H  | 0.923978046544  | 4.608826707109  | 0.157113208036  |
| H  | 2.202307073321  | 3.765422674707  | -0.742924931955 |
| H  | 0.895788288586  | 4.608416582157  | -1.601929723354 |
| S  | -0.507853239142 | -1.999964072528 | -0.698236134181 |

### DIDTDOAQX

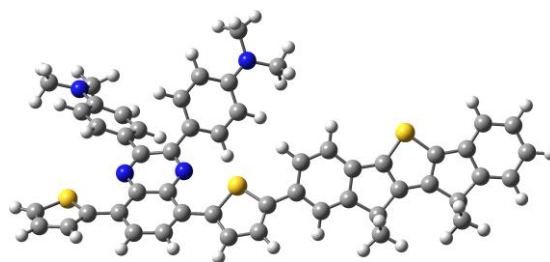

**E= -3499.65557918 ( $N_{\text{img}} = 0$ )**

|   |                 |                 |                 |
|---|-----------------|-----------------|-----------------|
| C | -3.587277993240 | -2.061586779023 | 0.146483182411  |
| C | -5.003139338254 | -2.232764974166 | 0.194284071859  |
| N | -5.807164066181 | -1.150834362259 | 0.079697697109  |
| C | -5.294965669979 | 0.061841901150  | -0.018349800400 |
| C | -3.860319945950 | 0.244927704598  | 0.095852593495  |
| N | -3.070031503113 | -0.812327032186 | 0.126297595009  |
| C | -2.705356022985 | -3.189195026374 | 0.172533725451  |
| C | -3.309288215617 | -4.440005655943 | 0.276549242832  |
| H | -2.692597857139 | -5.328050570375 | 0.326962307050  |
| C | -4.695877249740 | -4.606608501433 | 0.332596440038  |
| H | -5.082578670723 | -5.616384064265 | 0.384628531417  |
| C | -5.584242009382 | -3.535098372363 | 0.308157601549  |
| C | -3.198530547406 | 1.563411319424  | 0.216803144653  |
| C | -3.714611644200 | 2.594984865305  | 1.014161419660  |
| C | -3.039785160516 | 3.793549839299  | 1.181027114340  |
| C | -1.808030737723 | 4.038261568768  | 0.529096847562  |
| C | -1.282211273225 | 2.989642688527  | -0.262306668681 |
| H | -0.335081037094 | 3.109122691261  | -0.769343128601 |
| C | -6.254079291027 | 1.160031332946  | -0.273919580550 |
| C | -7.520420988658 | 1.142011292982  | 0.328399492614  |
| C | -8.466068146265 | 2.120991771588  | 0.070845384386  |
| C | -8.197329972552 | 3.176770736597  | -0.832149932025 |
| C | -6.933050883068 | 3.170719081034  | -1.467266236718 |
| H | -6.683152933209 | 3.930180710079  | -2.194514397086 |
| C | -5.990713015735 | 2.196081050143  | -1.181311905042 |
| C | -1.959816405940 | 1.789373799774  | -0.400779981334 |
| H | -1.523107754045 | 1.002080228753  | -1.002366808279 |
| H | -3.473879645655 | 4.542603549355  | 1.828066408646  |
| H | -4.653301609807 | 2.454855054015  | 1.535869490754  |
| H | -5.038066130804 | 2.233701386633  | -1.695050067255 |

|   |                  |                 |                 |
|---|------------------|-----------------|-----------------|
| H | -7.762105374150  | 0.338679031551  | 1.013127648977  |
| H | -9.421698769989  | 2.060937558295  | 0.572525225262  |
| C | -1.248994870948  | -3.079398104164 | 0.097309434290  |
| C | -0.364747051314  | -4.110085730357 | -0.159625879959 |
| C | 0.995308766825   | -3.739511935970 | -0.099320525798 |
| C | 1.189818599118   | -2.410463864403 | 0.206775662938  |
| C | -7.026224863692  | -3.776048910990 | 0.400007355065  |
| C | -7.630490856463  | -4.928998477878 | 0.860292676780  |
| C | -9.044793136787  | -4.925029110194 | 0.756023672388  |
| C | -9.523519553334  | -3.766276504813 | 0.212541680869  |
| S | -0.351670250475  | -1.597468289152 | 0.390437506551  |
| S | -8.254063184988  | -2.647584754848 | -0.154112474423 |
| H | -9.674531174793  | -5.743092260453 | 1.080525062180  |
| H | -7.073780857662  | -5.755290281972 | 1.281142747418  |
| H | -0.685370494279  | -5.116650050757 | -0.391357927069 |
| H | 1.806201965146   | -4.438788447457 | -0.255827079207 |
| N | -1.152222717898  | 5.245611670308  | 0.654812334871  |
| N | -9.123578041541  | 4.169666709678  | -1.077925672803 |
| C | 0.193365805239   | 5.397953840015  | 0.122035881961  |
| H | 0.521178349091   | 6.424752739342  | 0.275710960216  |
| H | 0.918145521906   | 4.728674309721  | 0.605968552727  |
| H | 0.216405791574   | 5.201549299955  | -0.953786245544 |
| C | -1.630130613990  | 6.233681879143  | 1.609821140166  |
| H | -2.665228041840  | 6.517597599582  | 1.398679257954  |
| H | -1.579360259542  | 5.877668030314  | 2.648336039236  |
| H | -1.019403591745  | 7.131223713037  | 1.526933326003  |
| C | -10.475729167844 | 4.043850168608  | -0.555320452279 |
| H | -11.040285764346 | 4.938165295588  | -0.814087046439 |
| H | -11.006675569694 | 3.171639690153  | -0.961491167540 |
| H | -10.471098862032 | 3.960662355561  | 0.535387538108  |
| C | -8.883547884772  | 5.137869354189  | -2.137123127664 |



|   |                  |                 |                 |
|---|------------------|-----------------|-----------------|
| H | -9.693450318013  | 5.865521671598  | -2.142321179068 |
| H | -7.950543204337  | 5.683280969960  | -1.968349719747 |
| H | -8.831824346468  | 4.673245453020  | -3.131762286584 |
| C | 2.455185023379   | -1.686577482910 | 0.341899448893  |
| C | 3.617465046623   | -2.159999083641 | -0.307865153799 |
| C | 4.815448518020   | -1.488399741572 | -0.166878777834 |
| C | 4.888266418929   | -0.316260487572 | 0.616957832871  |
| C | 3.750538510581   | 0.171682315675  | 1.259117358678  |
| C | 2.550321295915   | -0.517326330084 | 1.119701802091  |
| H | 1.671287664572   | -0.152672200006 | 1.638238736233  |
| H | -10.550630852435 | -3.485926415928 | 0.032470542335  |
| H | 3.553120951950   | -3.042916404593 | -0.933971259247 |
| C | 6.258557372543   | 0.138442159307  | 0.552766694857  |
| C | 7.045163626725   | -0.687938269447 | -0.231437925686 |
| C | 8.394190969096   | -0.229209661990 | -0.286450687101 |
| C | 8.570015865059   | 0.924494163959  | 0.456699806603  |
| H | 3.793490189827   | 1.067388242010  | 1.868637492067  |
| C | 6.180926354146   | -1.829589428736 | -0.783185932187 |
| C | 6.650574603965   | -3.217663451745 | -0.297282064523 |
| H | 5.933094204129   | -3.986308985083 | -0.596353485330 |
| H | 7.616842056871   | -3.477906904310 | -0.733116518201 |
| H | 6.744316871508   | -3.242639674496 | 0.790404683013  |
| C | 6.087983838016   | -1.807992463962 | -2.324282037370 |
| H | 7.050410589909   | -2.053375738026 | -2.776907129152 |
| H | 5.359349916809   | -2.545620086911 | -2.670615403225 |
| H | 5.777138523802   | -0.825480315771 | -2.685558424216 |
| S | 7.121084820636   | 1.484202978621  | 1.239248647765  |
| C | 9.936970902832   | 1.400862034878  | 0.408696914601  |
| C | 10.647542975939  | 0.494449915046  | -0.407008469601 |
| C | 9.733075698649   | -0.626581769993 | -0.921800505896 |
| C | 11.998945547475  | 0.689768238870  | -0.643758491374 |

|   |                 |                 |                 |
|---|-----------------|-----------------|-----------------|
| C | 12.643785134263 | 1.790848104246  | -0.066686388689 |
| H | 13.700731966017 | 1.949886668426  | -0.247698183751 |
| C | 11.936880346329 | 2.684139078568  | 0.739238970235  |
| H | 12.450132924941 | 3.531777037856  | 1.179341342323  |
| C | 10.576132483353 | 2.498363632612  | 0.985452200824  |
| H | 10.030938478288 | 3.194716715273  | 1.612872215145  |
| C | 10.241538425702 | -1.995617097270 | -0.419845236281 |
| H | 11.253772273538 | -2.181957590757 | -0.788274652357 |
| H | 10.263364392398 | -2.030074113861 | 0.671423466495  |
| H | 9.603369470218  | -2.805732331735 | -0.777177960363 |
| C | 9.686595757376  | -0.607708051020 | -2.464940886239 |
| H | 9.309521648903  | 0.348094502298  | -2.834843001450 |
| H | 10.687653531047 | -0.762665149905 | -2.876045630565 |
| H | 12.560898648840 | 0.002732114927  | -1.267964191899 |
| H | 9.043907073940  | -1.402834300069 | -2.847214126556 |

### DIDTDOATP

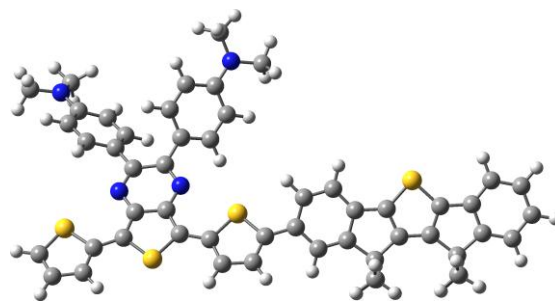

**E= -3820.41539254 ( $N_{\text{img}} = 0$ )**

|   |                |                 |                 |
|---|----------------|-----------------|-----------------|
| C | 4.774817489730 | -2.137578416140 | -0.181086622288 |
| C | 3.403271373466 | -1.721176993086 | -0.170198418130 |
| N | 3.077060923303 | -0.405029874004 | -0.166160013418 |
| C | 4.052154855896 | 0.479462802156  | -0.119211805695 |
| C | 5.455287644865 | 0.045296200136  | 0.018262457994  |
| N | 5.776130137989 | -1.229439996385 | -0.057575212004 |
| C | 4.945956526960 | -3.519878304771 | -0.257814867113 |

|   |                 |                 |                 |
|---|-----------------|-----------------|-----------------|
| C | 2.490694370504  | -2.776534155707 | -0.230149866767 |
| C | 6.571878691233  | 0.979109576201  | 0.284553188153  |
| C | 6.468206597062  | 2.046134322317  | 1.188862743904  |
| C | 7.553584745771  | 2.852296035142  | 1.491632841571  |
| C | 8.811936171149  | 2.648952219388  | 0.877722847085  |
| C | 8.917814163351  | 1.561851461220  | -0.022605264379 |
| H | 9.858565032210  | 1.344548285040  | -0.508624170275 |
| C | 3.647414538982  | 1.896231584223  | -0.250628419896 |
| C | 2.444980971882  | 2.335326477387  | 0.324541814146  |
| C | 1.992399775978  | 3.634722873438  | 0.171560699318  |
| C | 2.719737679356  | 4.576126701074  | -0.595705159510 |
| C | 3.911256121863  | 4.120282459010  | -1.207426165551 |
| H | 4.490183176445  | 4.781700625160  | -1.836253197267 |
| C | 4.361505832449  | 2.822772972388  | -1.024816899481 |
| C | 7.828822153598  | 0.751403687205  | -0.295608010523 |
| H | 7.945638092719  | -0.081500403975 | -0.978149126650 |
| H | 7.420414702342  | 3.643231599715  | 2.216027270244  |
| H | 5.527061302321  | 2.240662074517  | 1.687777369475  |
| H | 5.277129029984  | 2.521847936753  | -1.518129112792 |
| H | 1.858154613706  | 1.634772157814  | 0.905860463381  |
| H | 1.064896359578  | 3.918455515659  | 0.648793741412  |
| C | 6.153110572400  | -4.301085503256 | -0.273098932130 |
| C | 6.277294930732  | -5.670034869493 | -0.418896860129 |
| C | 7.617517977237  | -6.129864309624 | -0.375590887329 |
| C | 8.516678789017  | -5.116089391132 | -0.199638174729 |
| C | 1.057183543503  | -2.750898743477 | -0.259849940219 |
| C | 0.186366080771  | -3.826220619905 | -0.282896548254 |
| C | -1.174168932676 | -3.459431453374 | -0.321383825043 |
| C | -1.383745159238 | -2.096723893637 | -0.327534779107 |
| S | 7.742403701160  | -3.569350139433 | -0.079825090232 |
| S | 0.149611819799  | -1.244093661555 | -0.276025581195 |

|   |                 |                 |                 |
|---|-----------------|-----------------|-----------------|
| H | -1.979102375740 | -4.180555904315 | -0.372810332013 |
| H | 0.524054649920  | -4.854781951481 | -0.282723310296 |
| H | 5.426927236960  | -6.325288672090 | -0.557494388927 |
| H | 7.899422233641  | -7.169789566942 | -0.474631434867 |
| N | 9.884870657647  | 3.475018434706  | 1.140412670165  |
| N | 2.288821466344  | 5.878586931259  | -0.735992502207 |
| C | 11.205436063518 | 3.131091432665  | 0.634973734435  |
| H | 11.904566597759 | 3.921411743359  | 0.903172764954  |
| H | 11.581704160498 | 2.184092425602  | 1.046059887980  |
| H | 11.201753816404 | 3.050147641235  | -0.455915153356 |
| C | 9.789649892598  | 4.473247258957  | 2.194834013186  |
| H | 8.964591993741  | 5.166731649288  | 2.007850597572  |
| H | 9.641172219093  | 4.026370106581  | 3.187727399994  |
| H | 10.709830301706 | 5.054743281838  | 2.216968862050  |
| C | 0.971708390681  | 6.262869263975  | -0.250645254776 |
| H | 0.831059227834  | 7.329975245621  | -0.414266506616 |
| H | 0.160622996694  | 5.726320244445  | -0.761935928857 |
| H | 0.876932509196  | 6.077937992718  | 0.823350656452  |
| C | 2.970553416550  | 6.772631096066  | -1.659551487865 |
| H | 2.526813405327  | 7.764126022733  | -1.586020300472 |
| H | 4.030844790829  | 6.865440135307  | -1.407305548088 |
| H | 2.896361142070  | 6.438837051287  | -2.703949307534 |
| S | 3.374044451201  | -4.285063659423 | -0.304471315678 |
| C | -2.654280926545 | -1.374466726065 | -0.365953047961 |
| C | -3.834580904524 | -1.991488370306 | 0.108421429702  |
| C | -5.038765840175 | -1.318957810939 | 0.058211405016  |
| C | -5.101854816858 | -0.005669811148 | -0.457423441969 |
| C | -3.946985051950 | 0.623388141031  | -0.921944370580 |
| C | -2.739451952138 | -0.064778357895 | -0.875345224829 |
| H | -1.846536180839 | 0.413749677962  | -1.260653777609 |
| C | -6.482871863590 | 0.408300886528  | -0.364199102109 |

|   |                  |                 |                 |
|---|------------------|-----------------|-----------------|
| C | -7.285543741731  | -0.576384174490 | 0.186554696769  |
| C | -8.645182113261  | -0.155993174158 | 0.273640441176  |
| C | -8.813026516620  | 1.127371673154  | -0.215643823838 |
| H | -3.982085686083  | 1.629411181685  | -1.324705490074 |
| H | -3.779180538121  | -2.988266337182 | 0.531310448519  |
| C | -6.422683473416  | -1.800503481479 | 0.520542021227  |
| H | 9.592363920331   | -5.177651103076 | -0.134601562274 |
| C | -6.840546722531  | -3.055815543505 | -0.275114118645 |
| H | -6.123217291366  | -3.864161917416 | -0.110406477450 |
| H | -7.821523248098  | -3.412265885469 | 0.043962416666  |
| H | -6.880653899058  | -2.847301675805 | -1.346280691393 |
| C | -6.399143303277  | -2.111627010990 | 2.032689050026  |
| H | -7.376342303768  | -2.456674075095 | 2.375177883383  |
| H | -5.673718319999  | -2.900977838573 | 2.246282572257  |
| H | -6.122740890848  | -1.227959822998 | 2.611635264756  |
| S | -7.343370911416  | 1.859091457597  | -0.789578498079 |
| C | -10.191023912140 | 1.565764643975  | -0.134740505148 |
| C | -10.828172529066 | 2.752226088780  | -0.498157007695 |
| C | -12.202614750039 | 2.864264196429  | -0.286012655517 |
| C | -12.924837696749 | 1.811756223539  | 0.277805802216  |
| H | -13.992330286897 | 1.915355015365  | 0.435644776265  |
| C | -12.281853965542 | 0.622045546967  | 0.641523463706  |
| H | -12.855602916692 | -0.188464791587 | 1.078859837840  |
| C | -10.916978056198 | 0.498410041829  | 0.435792386013  |
| C | -10.001310341382 | -0.693712693707 | 0.749226422724  |
| H | -10.270916141207 | 3.572435641631  | -0.936908609357 |
| H | -12.714583609846 | 3.779126147101  | -0.562621898309 |
| C | -10.457747741334 | -1.936810538928 | -0.044738626037 |
| H | -10.428449184899 | -1.749042753302 | -1.120100766304 |
| H | -9.820179942820  | -2.795515806354 | 0.173109246670  |
| H | -11.481830727237 | -2.205284184842 | 0.227841961052  |

|   |                  |                 |                |
|---|------------------|-----------------|----------------|
| C | -10.020951756646 | -0.992976126423 | 2.264014602379 |
| H | -9.378936866077  | -1.842657137965 | 2.503211580896 |
| H | -9.679760588229  | -0.129892204226 | 2.839532717237 |
| H | -11.035263371936 | -1.240771945578 | 2.587876462538 |

### FDOAQX

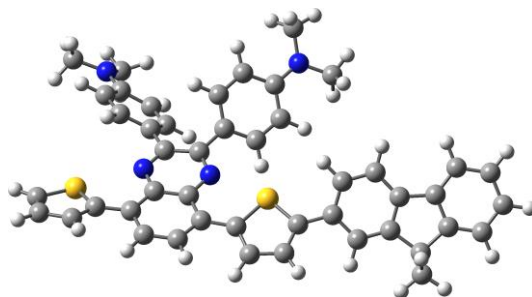

**E= -2831.03015972 ( $N_{\text{img}} = 0$ )**

|   |                 |                 |                 |
|---|-----------------|-----------------|-----------------|
| C | 0.857272545033  | -1.750310157988 | 0.097254786203  |
| C | -0.567760118257 | -1.791122362549 | 0.158691703787  |
| N | -1.269560677415 | -0.638313483349 | 0.066099376920  |
| C | -0.648761208959 | 0.523297228722  | -0.022299404123 |
| C | 0.797661124509  | 0.572071439277  | 0.080670845527  |
| N | 1.487277688415  | -0.553787823385 | 0.088991664767  |
| C | 1.631277983070  | -2.954669700152 | 0.096866523434  |
| C | 0.916016093803  | -4.145948326352 | 0.190071509049  |
| H | 1.449028654033  | -5.087495471888 | 0.220499030201  |
| C | -0.479450569770 | -4.185010045446 | 0.261016414881  |
| H | -0.957127296705 | -5.155495312593 | 0.303895917706  |
| C | -1.265217655108 | -3.035995038303 | 0.262780929428  |
| C | 1.579539602990  | 1.821887990842  | 0.213462224291  |
| C | 1.165281212650  | 2.887188055697  | 1.025771610860  |
| C | 1.949585050284  | 4.015546531390  | 1.203150184165  |
| C | 3.196036898271  | 4.152436031270  | 0.547648374834  |
| C | 3.618617790012  | 3.069057008514  | -0.258674510171 |
| H | 4.570527202482  | 3.106038454808  | -0.769482823330 |

|   |                 |                 |                 |
|---|-----------------|-----------------|-----------------|
| C | -1.504975882921 | 1.708088797592  | -0.255742691914 |
| C | -2.762364146179 | 1.798867462027  | 0.358608011581  |
| C | -3.616269586241 | 2.863619213097  | 0.121864972513  |
| C | -3.259466789148 | 3.901663416896  | -0.771163214793 |
| C | -2.006585700994 | 3.787550979952  | -1.418568338162 |
| H | -1.694067019078 | 4.530023301351  | -2.139110432302 |
| C | -1.155311747247 | 2.726992282344  | -1.153344220219 |
| C | 2.831612563884  | 1.938882442622  | -0.407695013945 |
| H | 3.190495264737  | 1.121627840793  | -1.020678386965 |
| H | 1.589834744804  | 4.793695131246  | 1.861347195160  |
| H | 0.219988779305  | 2.828731199431  | 1.551064263230  |
| H | -0.207690121937 | 2.683409588704  | -1.675826681043 |
| H | -3.071053729910 | 1.012657375102  | 1.036297571635  |
| H | -4.568946012771 | 2.885035455403  | 0.632202105809  |
| C | 3.090964291446  | -2.978825112721 | 0.005330275734  |
| C | 3.872014743699  | -4.080147365532 | -0.289428344411 |
| C | 5.261554035264  | -3.839219347512 | -0.236490831537 |
| C | 5.581446800789  | -2.543352529015 | 0.102292567496  |
| C | -2.722064368821 | -3.144737089632 | 0.371302195916  |
| C | -3.423571288780 | -4.244189029370 | 0.824529326071  |
| C | -4.832762403142 | -4.108963380942 | 0.741178546845  |
| C | -5.210176252657 | -2.903118251593 | 0.220880838426  |
| S | 4.125194577822  | -1.595817431800 | 0.326378836543  |
| S | -3.848276541655 | -1.900285089269 | -0.149128249214 |
| H | -5.530610559851 | -4.870657134946 | 1.063544806936  |
| H | -2.939627484752 | -5.124227229445 | 1.225941130860  |
| H | 3.456030858545  | -5.045484779185 | -0.543889976950 |
| H | 6.002969392021  | -4.605287539169 | -0.422313577796 |
| N | 3.961970903676  | 5.291909681059  | 0.684034692250  |
| N | -4.092804046294 | 4.978337693630  | -0.995799403958 |
| C | 5.315305324704  | 5.323018020540  | 0.149982228345  |

|   |                 |                 |                 |
|---|-----------------|-----------------|-----------------|
| H | 5.739473067108  | 6.311781107847  | 0.316818824046  |
| H | 5.973580414092  | 4.581254687027  | 0.623156222807  |
| H | 5.318567740787  | 5.139988199251  | -0.928451205609 |
| C | 3.579973023374  | 6.310232335607  | 1.650321990919  |
| H | 2.574214081955  | 6.689072363138  | 1.446700889428  |
| H | 3.602197601300  | 5.941437102003  | 2.685422289367  |
| H | 4.269392629379  | 7.149335660972  | 1.572436219729  |
| C | -5.446503155119 | 4.969304887449  | -0.462188083808 |
| H | -5.930029582785 | 5.913721427196  | -0.706349280378 |
| H | -6.057335377161 | 4.153300883875  | -0.872796521723 |
| H | -5.440572742427 | 4.873646514474  | 0.627518967976  |
| C | -3.773753009726 | 5.934931664361  | -2.044648119229 |
| H | -4.511837361147 | 6.735318038568  | -2.031090522430 |
| H | -2.792185204214 | 6.388177990261  | -1.878924392288 |
| H | -3.775549484650 | 5.481906100370  | -3.045975276411 |
| C | 6.911233864668  | -1.943522594073 | 0.239678705532  |
| C | 8.010563668100  | -2.487403039038 | -0.456539649211 |
| C | 9.268811274472  | -1.929908851631 | -0.311606803346 |
| C | 9.465777933002  | -0.810982604022 | 0.518806923235  |
| C | 8.387434252289  | -0.255826785386 | 1.207231251401  |
| C | 7.126282118485  | -0.824387289384 | 1.067375232615  |
| H | 6.293608914622  | -0.407364225941 | 1.621833358563  |
| H | -6.209494842321 | -2.527219968231 | 0.059519105024  |
| H | 7.855400232671  | -3.330362550971 | -1.120626159750 |
| C | 10.881667339532 | -0.436198696495 | 0.471979171038  |
| C | 11.549753727533 | -1.324983327733 | -0.391224205753 |
| C | 12.913450223204 | -1.190343238287 | -0.614811502196 |
| C | 13.611568299848 | -0.163271928311 | 0.027543929604  |
| H | 14.676795596237 | -0.049965308890 | -0.140129795071 |
| C | 12.947996917278 | 0.718077774797  | 0.884134954768  |
| H | 13.503419609042 | 1.509140038378  | 1.375576707402  |



|   |                 |                 |                 |
|---|-----------------|-----------------|-----------------|
| C | 11.578678880229 | 0.588911175755  | 1.112974868240  |
| H | 13.439834958705 | -1.869101271420 | -1.277926791938 |
| H | 8.521632150093  | 0.603480643927  | 1.855148229116  |
| H | 11.069184741850 | 1.275969973367  | 1.779927863772  |
| C | 10.581140705708 | -2.355607475023 | -0.970261246724 |
| C | 10.976563855749 | -3.791041083760 | -0.560531451015 |
| H | 10.241259441820 | -4.512431434639 | -0.927515718747 |
| H | 11.949371926732 | -4.057386992613 | -0.982929504253 |
| H | 11.037216770377 | -3.886414799222 | 0.525826397213  |
| C | 10.499610996098 | -2.247959228471 | -2.508634843495 |
| H | 11.464245228969 | -2.490861688740 | -2.962719879547 |
| H | 9.755933829404  | -2.944795625047 | -2.904901186350 |
| H | 10.220453327180 | -1.238034621465 | -2.816956773100 |

### FDOATP

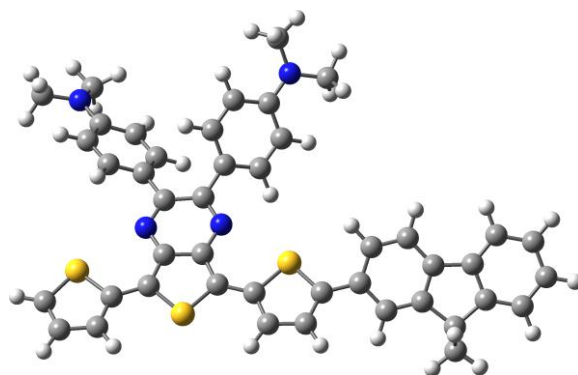

**E= -3151.78992193 ( $N_{\text{img}} = 0$ )**

|   |                 |                 |                |
|---|-----------------|-----------------|----------------|
| C | -0.543687591633 | -1.422216999850 | 0.178811691880 |
| C | 0.887328405985  | -1.379449611034 | 0.111815179801 |
| N | 1.546667307913  | -0.194559824166 | 0.095187868522 |
| C | 0.836381634816  | 0.914713420558  | 0.090179216349 |
| C | -0.636031328332 | 0.865097899877  | 0.013490151966 |
| N | -1.276151129119 | -0.282301501881 | 0.100264746216 |
| C | -1.068046173450 | -2.712303576711 | 0.260006851223 |

|   |                 |                 |                 |
|---|-----------------|-----------------|-----------------|
| C | 1.492975499161  | -2.637320763678 | 0.133663722825  |
| C | -1.479140951572 | 2.062292566816  | -0.200328480354 |
| C | -1.138080237700 | 3.078413936166  | -1.104988423308 |
| C | -1.986988277173 | 4.143882630626  | -1.357440282614 |
| C | -3.228372349679 | 4.266687594753  | -0.689936954491 |
| C | -3.576952754590 | 3.231979449315  | 0.210901419843  |
| H | -4.520816174981 | 3.260385031793  | 0.737019750524  |
| C | 1.603470951238  | 2.174686813755  | 0.203452620777  |
| C | 2.849464273568  | 2.294042475238  | -0.431019244262 |
| C | 3.631784604418  | 3.428691035704  | -0.299090948301 |
| C | 3.212776942567  | 4.515492460457  | 0.505391899691  |
| C | 1.974886246426  | 4.376245873583  | 1.176217242511  |
| H | 1.619363068935  | 5.156178740809  | 1.834545562680  |
| C | 1.193799743041  | 3.243392119607  | 1.014372873256  |
| C | -2.726819562022 | 2.162002243530  | 0.433612017943  |
| H | -3.028864688415 | 1.378619667490  | 1.117913843361  |
| H | -1.682097729134 | 4.883029077854  | -2.084616467211 |
| H | -0.200530977795 | 3.027940252101  | -1.644401025011 |
| H | 0.256074676239  | 3.183682126253  | 1.552407412317  |
| H | 3.204629139614  | 1.473593591019  | -1.042499422863 |
| H | 4.576956293288  | 3.468358268182  | -0.822140180433 |
| C | -2.436697235788 | -3.149109021548 | 0.323066994853  |
| C | -2.910616122352 | -4.437375758572 | 0.485109777794  |
| C | -4.325187940132 | -4.529426600728 | 0.488169292234  |
| C | -4.932242611745 | -3.315271851605 | 0.331537898351  |
| C | 2.883855808988  | -2.986853450969 | 0.107876970067  |
| C | 3.444709521483  | -4.251857404936 | 0.109628753868  |
| C | 4.854497787617  | -4.251855663462 | 0.089600564156  |
| C | 5.410716859222  | -2.991011084004 | 0.070548555938  |
| S | -3.783973124810 | -2.025773309683 | 0.174001063095  |
| S | 4.151802073000  | -1.768570559647 | 0.071037127041  |

|   |                 |                 |                 |
|---|-----------------|-----------------|-----------------|
| H | 5.446002482482  | -5.157350470032 | 0.117602988269  |
| H | 2.851283830375  | -5.156854355958 | 0.136088751887  |
| H | -2.257663905656 | -5.292530732721 | 0.603513332414  |
| H | -4.866568456685 | -5.458807729370 | 0.605954546979  |
| N | -4.058534398537 | 5.347298551853  | -0.903126329279 |
| N | 3.974045782178  | 5.659082818375  | 0.625349380727  |
| C | -5.401808520186 | 5.351179038153  | -0.343332173647 |
| H | -5.882535280939 | 6.298429948977  | -0.581988323881 |
| H | -6.026506279505 | 4.538546788935  | -0.739146212138 |
| H | -5.375696202013 | 5.259509178091  | 0.746445345960  |
| C | -3.748190473565 | 6.303094019226  | -1.955414047628 |
| H | -2.762690029394 | 6.752185844528  | -1.801654801885 |
| H | -3.764105577101 | 5.849847897294  | -2.956377871192 |
| H | -4.482927667433 | 7.106205246508  | -1.933026720470 |
| C | 5.318787114761  | 5.696844971386  | 0.070405488275  |
| H | 5.738601897427  | 6.689291287672  | 0.225635423678  |
| H | 5.989065073239  | 4.962438080642  | 0.537969585694  |
| H | 5.306956442899  | 5.507897354145  | -1.007001842761 |
| C | 3.594743900933  | 6.685674243141  | 1.584126215901  |
| H | 4.279362375639  | 7.527213581020  | 1.492223136663  |
| H | 2.585373707124  | 7.057230523765  | 1.384878805491  |
| H | 3.627455267291  | 6.327276899541  | 2.622426885870  |
| S | 0.248771442827  | -3.862905826444 | 0.239637864837  |
| C | 6.826982628914  | -2.623917301762 | 0.048898811609  |
| C | 7.783730671909  | -3.522472420485 | -0.468825473992 |
| C | 9.124509195313  | -3.181739578447 | -0.473406376850 |
| C | 9.549659544519  | -1.935204926299 | 0.023090628002  |
| C | 8.615533719035  | -1.032069690232 | 0.529903810952  |
| C | 7.270025411767  | -1.381370487834 | 0.543425838591  |
| H | 6.548852289056  | -0.689170673694 | 0.962538524947  |
| C | 11.005473786518 | -1.847149586245 | -0.116358980050 |

|   |                 |                 |                 |
|---|-----------------|-----------------|-----------------|
| C | 11.470236472008 | -3.040324106759 | -0.701034701106 |
| C | 12.825428879407 | -3.217775032652 | -0.945205704154 |
| H | 13.196064531717 | -4.132952216926 | -1.395221869655 |
| C | 13.719037822821 | -2.198202453518 | -0.603542531797 |
| H | 14.779330992765 | -2.327157338764 | -0.790079301467 |
| C | 13.257093491713 | -1.014438180684 | -0.023636404698 |
| C | 11.897619622737 | -0.829452067306 | 0.224359605320  |
| H | 11.545126987854 | 0.091904924588  | 0.675179709636  |
| H | 8.925433587144  | -0.069306063874 | 0.921301133231  |
| H | 7.455875193577  | -4.469970453562 | -0.881445457123 |
| H | 13.962643639012 | -0.233018500984 | 0.235882753421  |
| C | 10.312715729778 | -3.997469866767 | -0.983292902318 |
| H | -5.987986604573 | -3.092383606291 | 0.302015869087  |
| C | 10.468795407279 | -5.316151654727 | -0.194904118267 |
| H | 9.603882901865  | -5.965646111231 | -0.355728830427 |
| H | 11.361085073992 | -5.856628672568 | -0.522608429870 |
| H | 10.558694471754 | -5.124534448155 | 0.876599944423  |
| C | 10.185356621810 | -4.295748714051 | -2.493117435351 |
| H | 11.072921027060 | -4.820495538114 | -2.857322262306 |
| H | 9.315912516588  | -4.929311592960 | -2.688902955615 |
| H | 10.072944133400 | -3.373491351434 | -3.067308824168 |

DIDTDOAQX

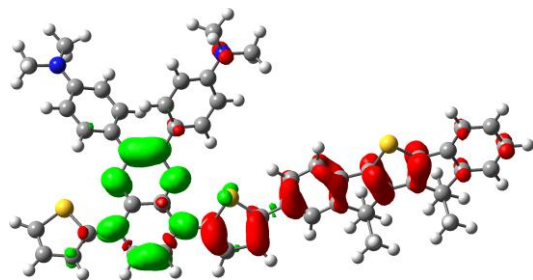

$\lambda_{\text{calc}} = 551 \text{ nm}$

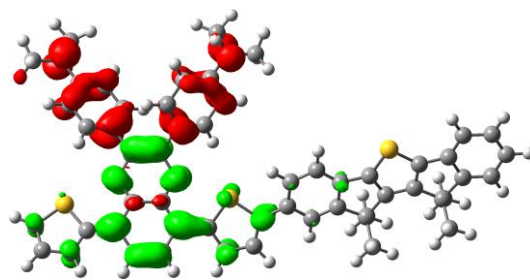

$\lambda_{\text{calc}} = 514 \text{ nm}$

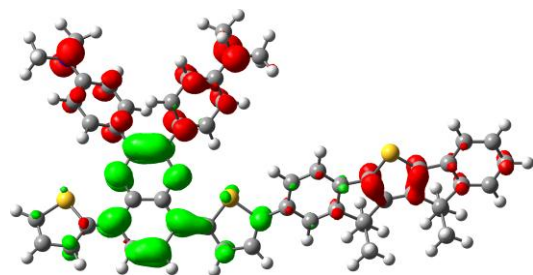

$\lambda_{\text{calc}} = 456 \text{ nm}$

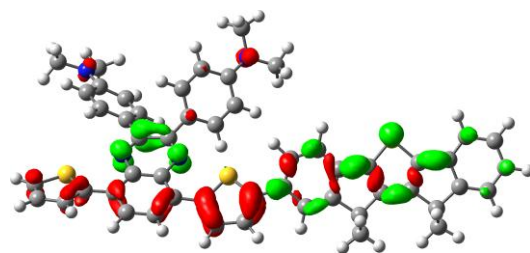

$\lambda_{\text{calc}} = 427 \text{ nm}$

FDOAQX

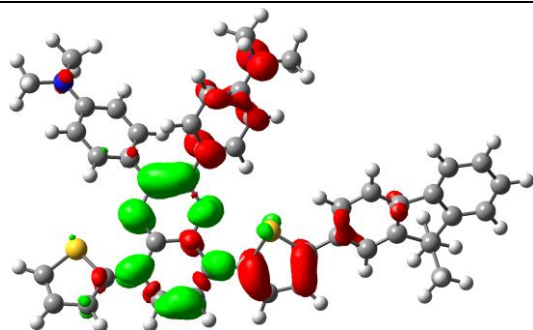

$\lambda_{\text{calc}} = 527 \text{ nm}$

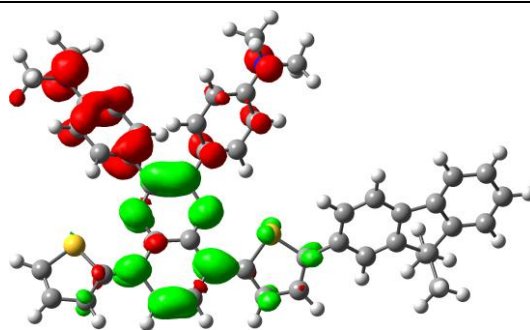

$\lambda_{\text{calc}} = 508 \text{ nm}$

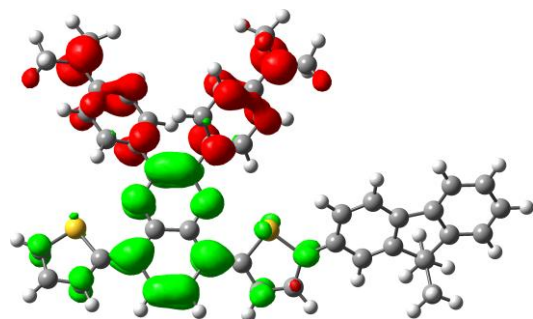

$\lambda_{\text{calc}} = 448 \text{ nm}$

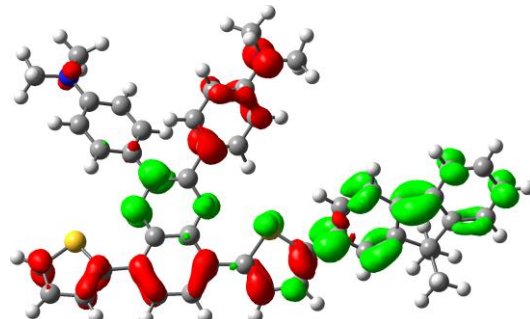

$\lambda_{\text{calc}} = 386 \text{ nm}$

DIDTDOATP

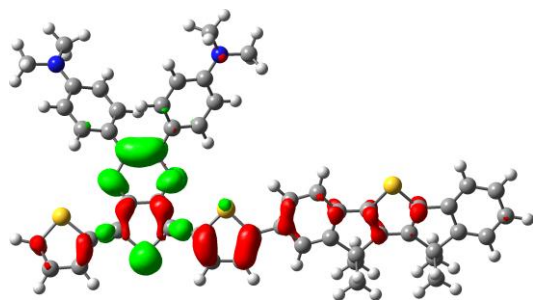

$\lambda_{\text{calc}} = 684 \text{ nm}$

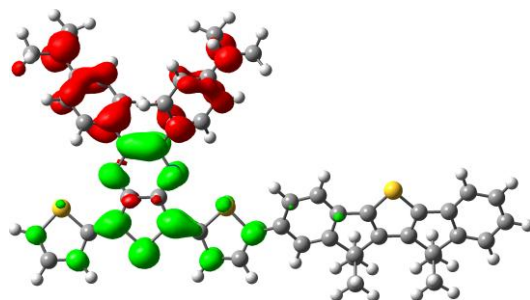

$\lambda_{\text{calc}} = 570 \text{ nm}$

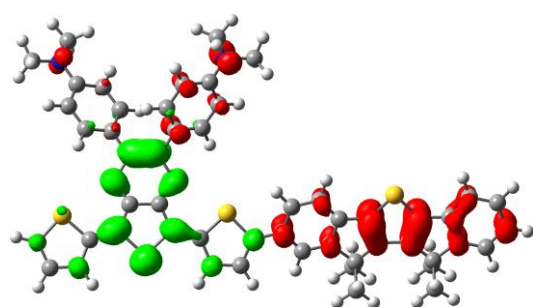

$\lambda_{\text{calc}} = 508 \text{ nm}$

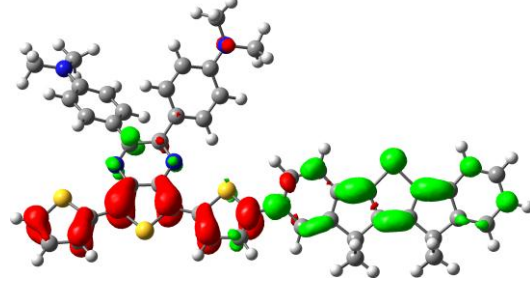

$\lambda_{\text{calc}} = 466 \text{ nm}$

FDOATP

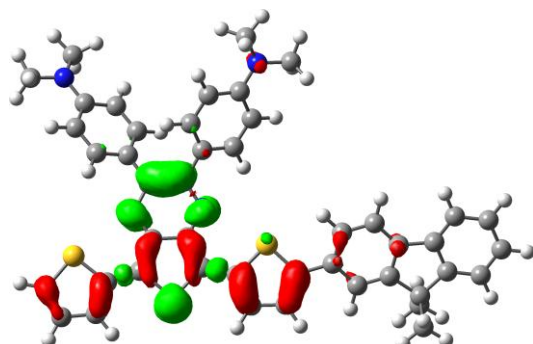

$\lambda_{\text{calc}} = 662 \text{ nm}$

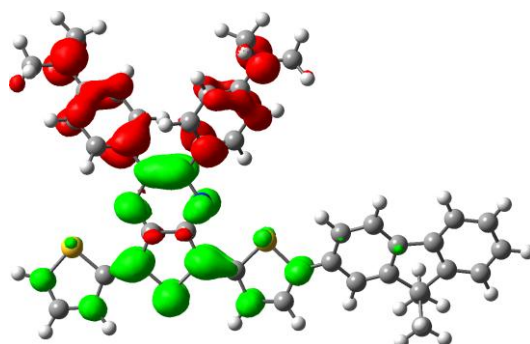

$\lambda_{\text{calc}} = 569 \text{ nm}$

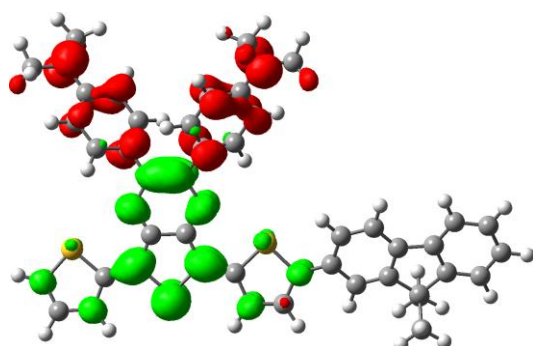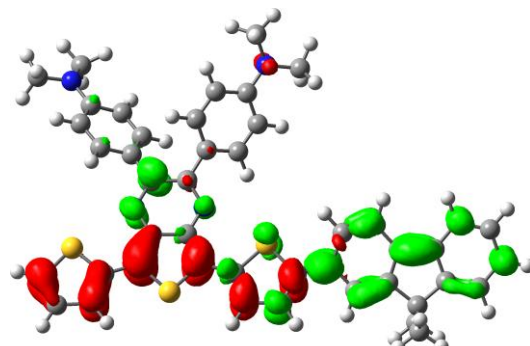

$$\lambda_{\text{calc}} = 493 \text{ nm}$$

$$\lambda_{\text{calc}} = 433 \text{ nm}$$

---

Figure S1 Electron density difference maps (EDDMs) of selected singlet electronic transitions of **DIDTDOAQX** (at 551, 514, and 427 nm), **FDOAQX** (at 527, 508, 448, and 386 nm), **DIDTDOATP** (at 684, 570, 507, and 466 nm), and **FDOATP** (at 662, 569, 493, and 433 nm). Red indicates a decrease in charge density, while green indicates an increase. All EDMs are plotted with isovalue 0.0012 au.

## 2. NMR and Mass Spectra

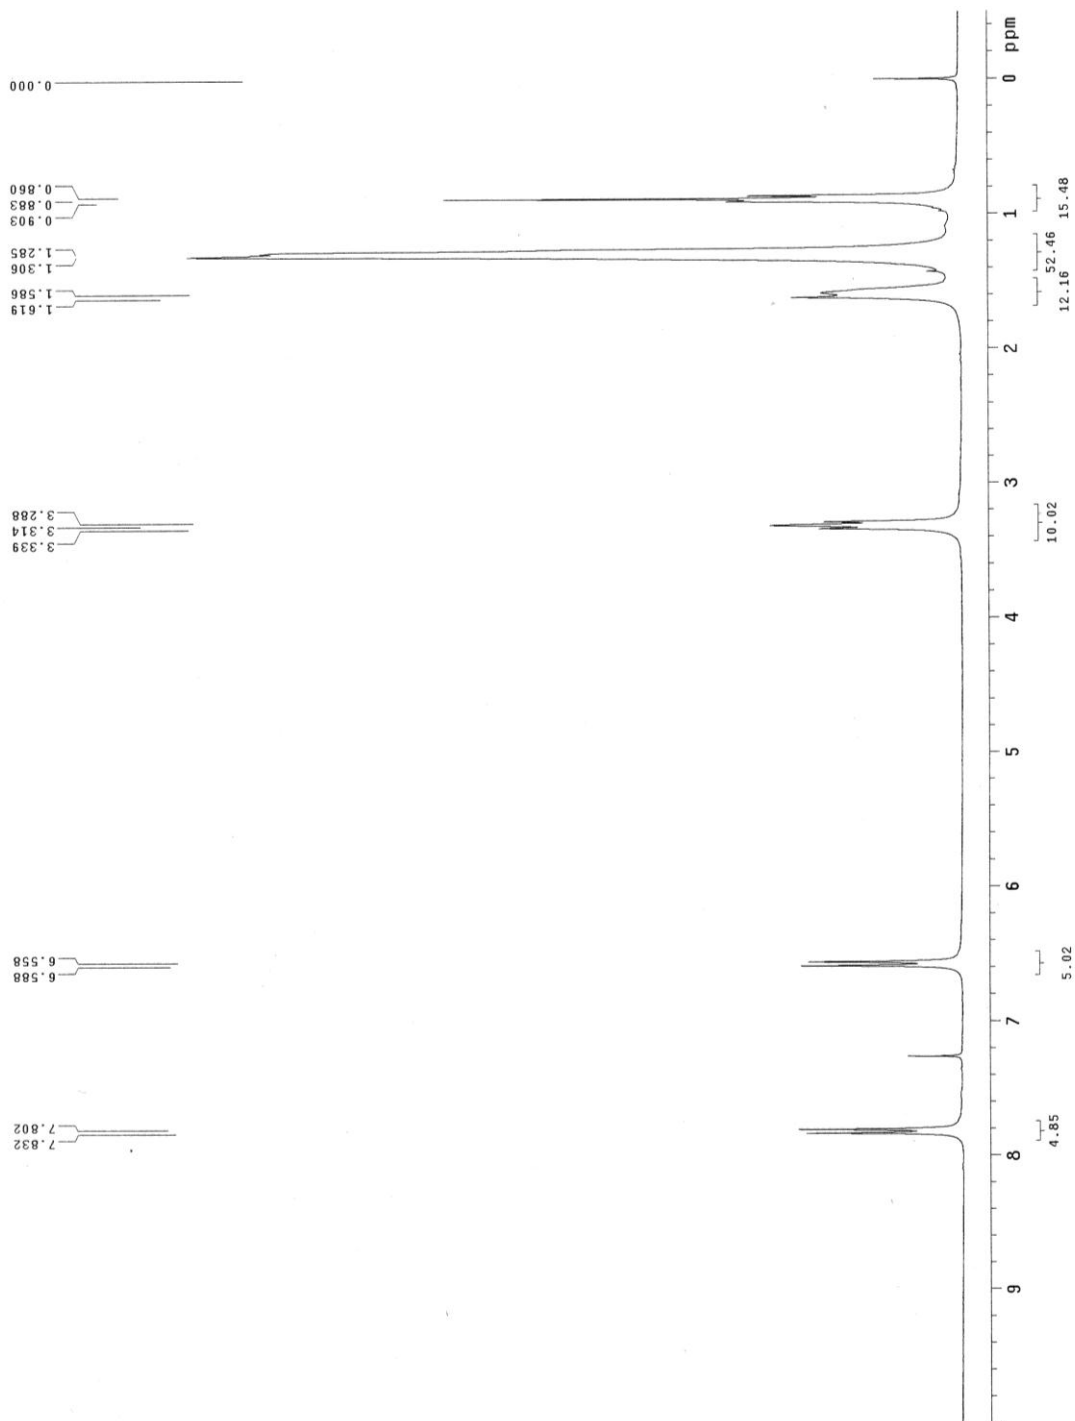

Figure S 2  $^1\text{H}$  NMR spectrum of 1,2-bis(4-dioctylaminophenyl)ethane-1,2-dione (4) in  $\text{CDCl}_3$



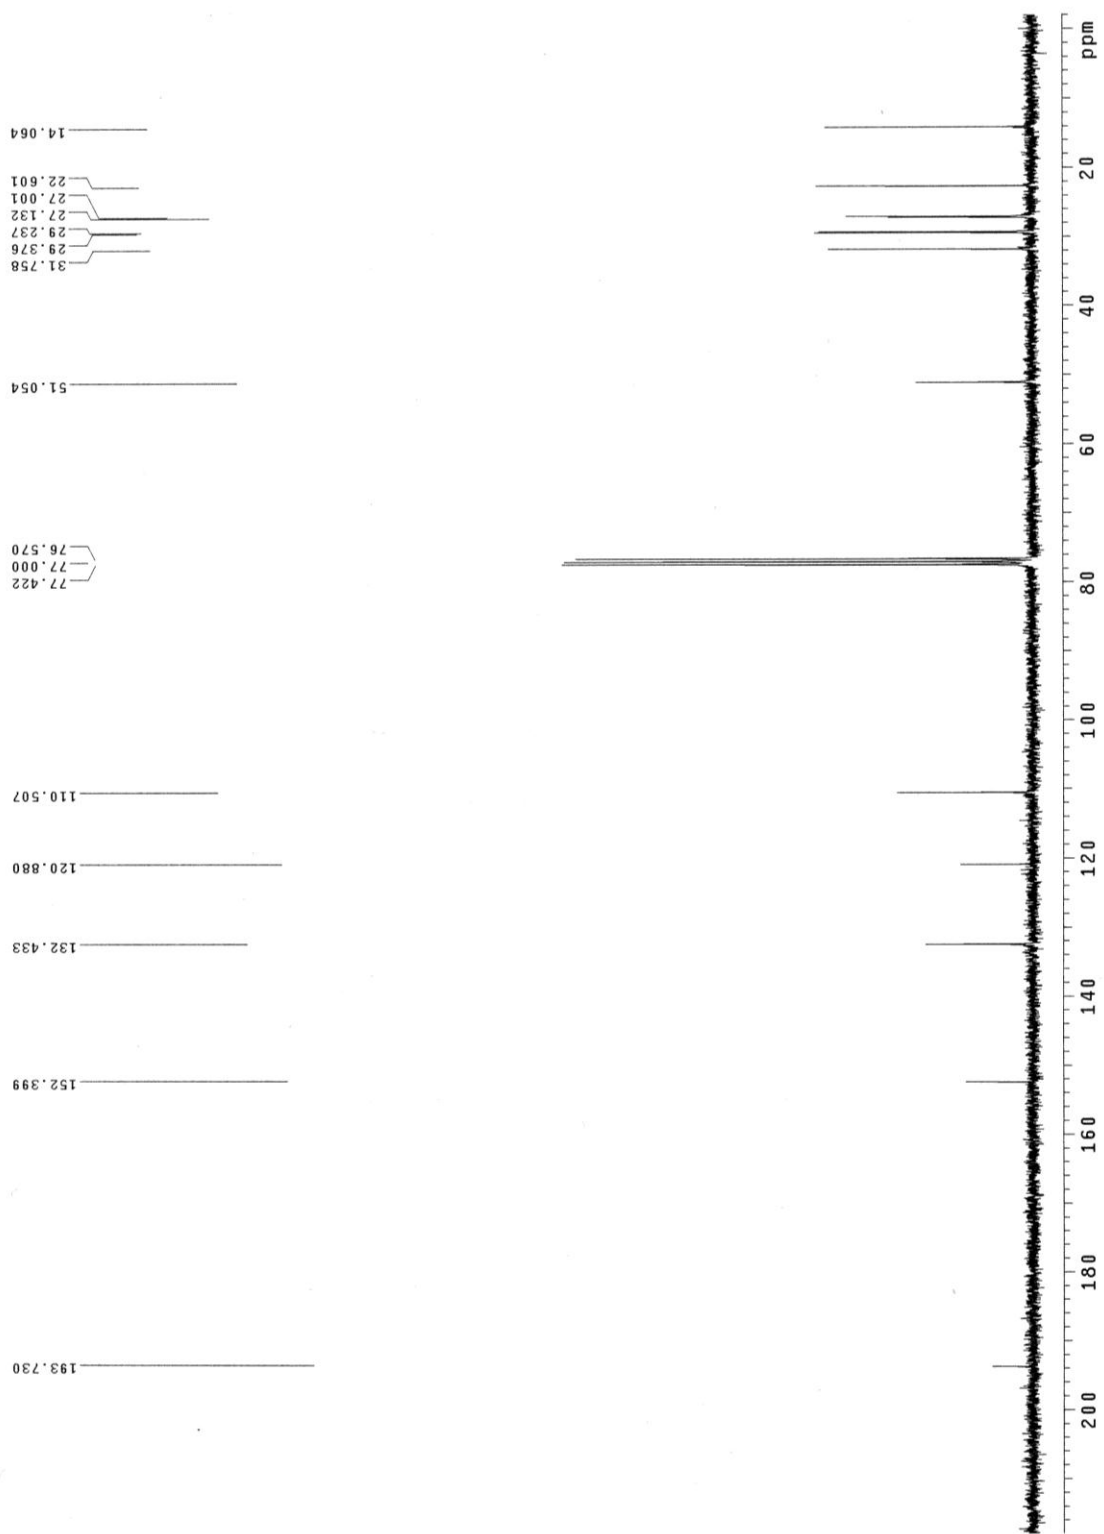

Figure S 3  $^{13}\text{C}$  NMR spectrum of 1,2-bis(4-dioctylaminophenyl)ethane-1,2-dione (4) in  $\text{CDCl}_3$

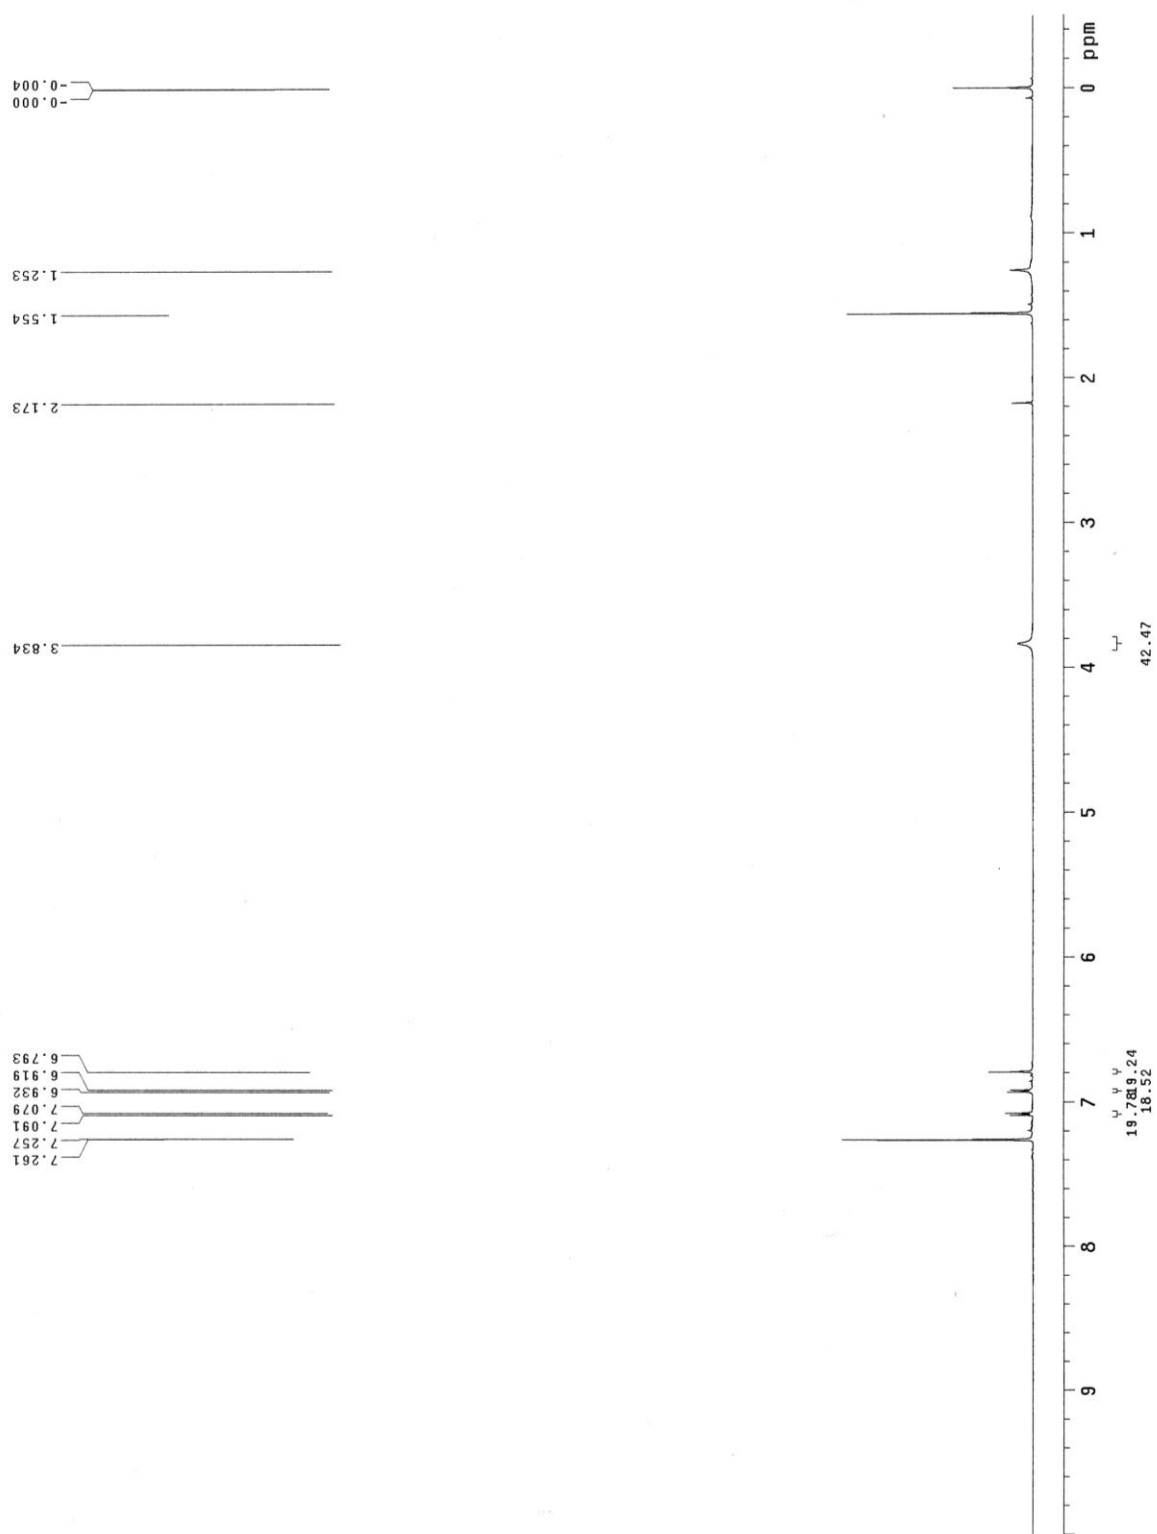

Figure S 4  $^1\text{H}$  NMR spectrum of 3,6-bis(5-bromothiophen-2-yl)benzene-1,2-diamine (8) in  $\text{CDCl}_3$

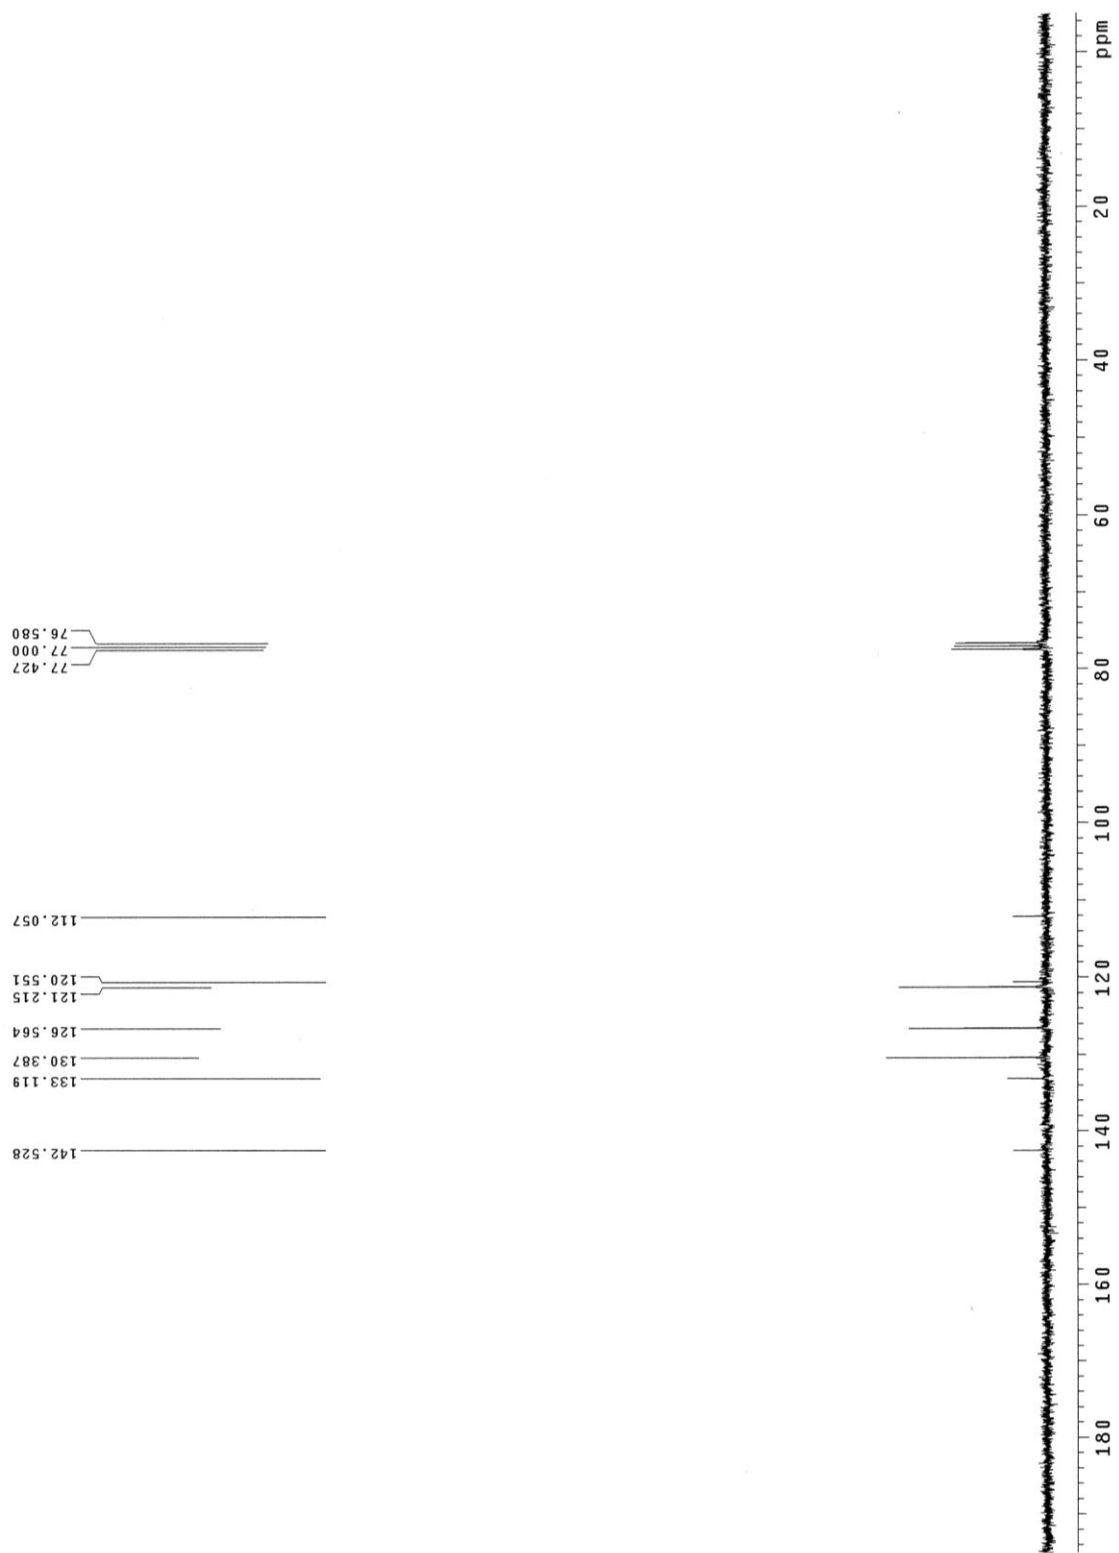

Figure S 5  $^{13}\text{C}$  NMR spectrum of 3,6-bis(5-bromothiophen-2-yl)benzene-1,2-diamine (8) in  $\text{CDCl}_3$

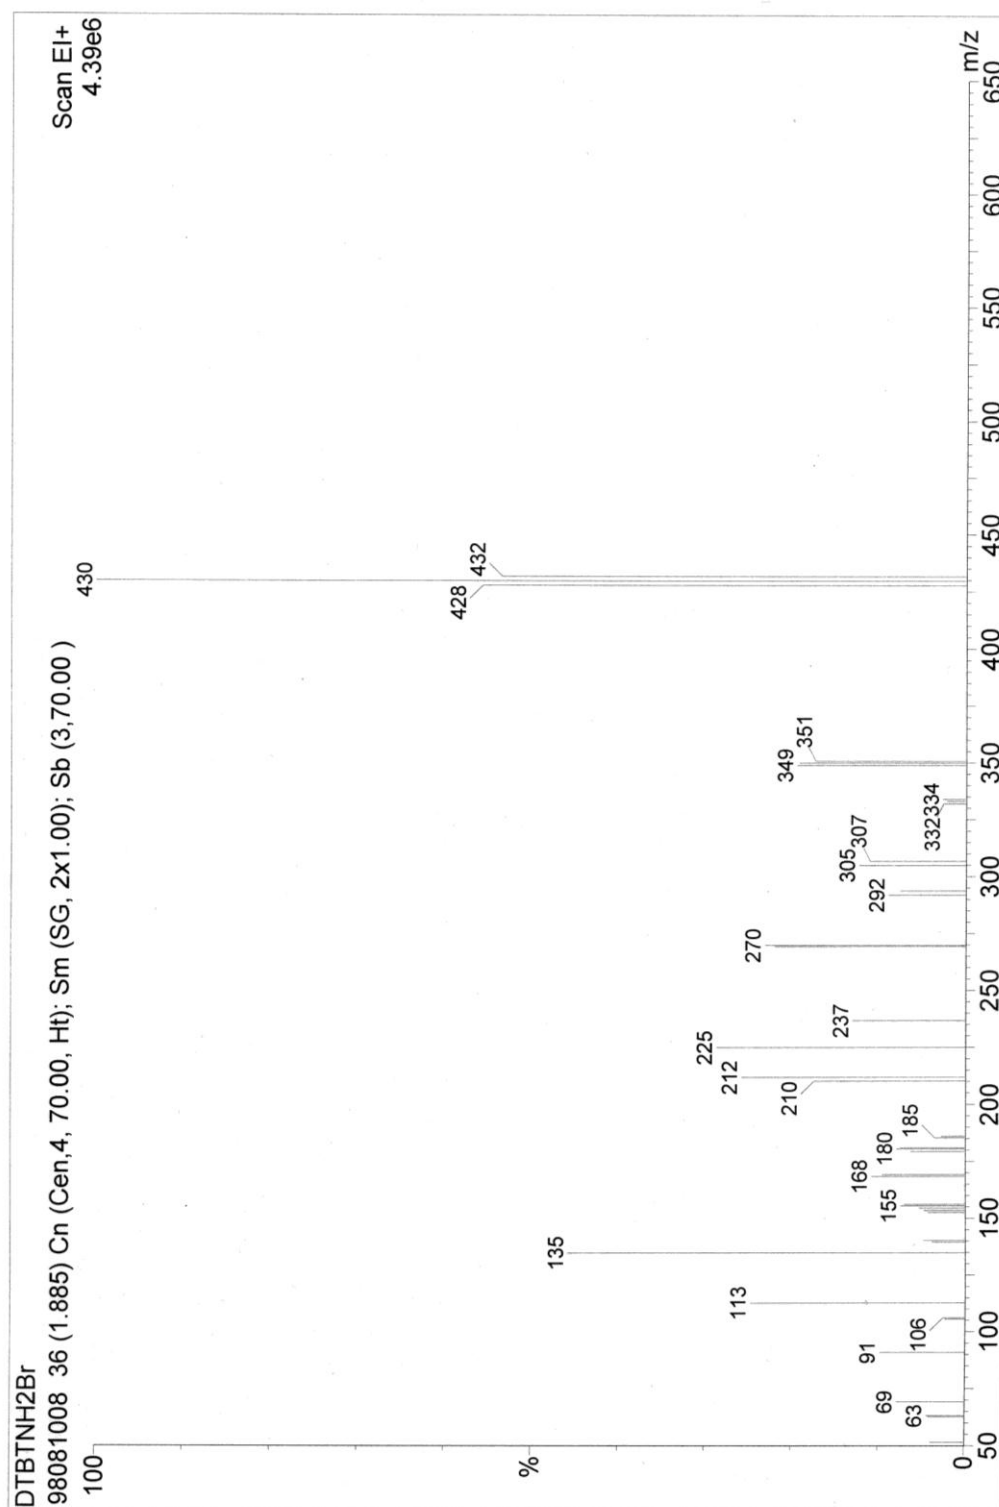

Figure S 6 EI spectrum of **3,6-bis(5-bromothiophen-2-yl)benzene-1,2-diamine (8)**

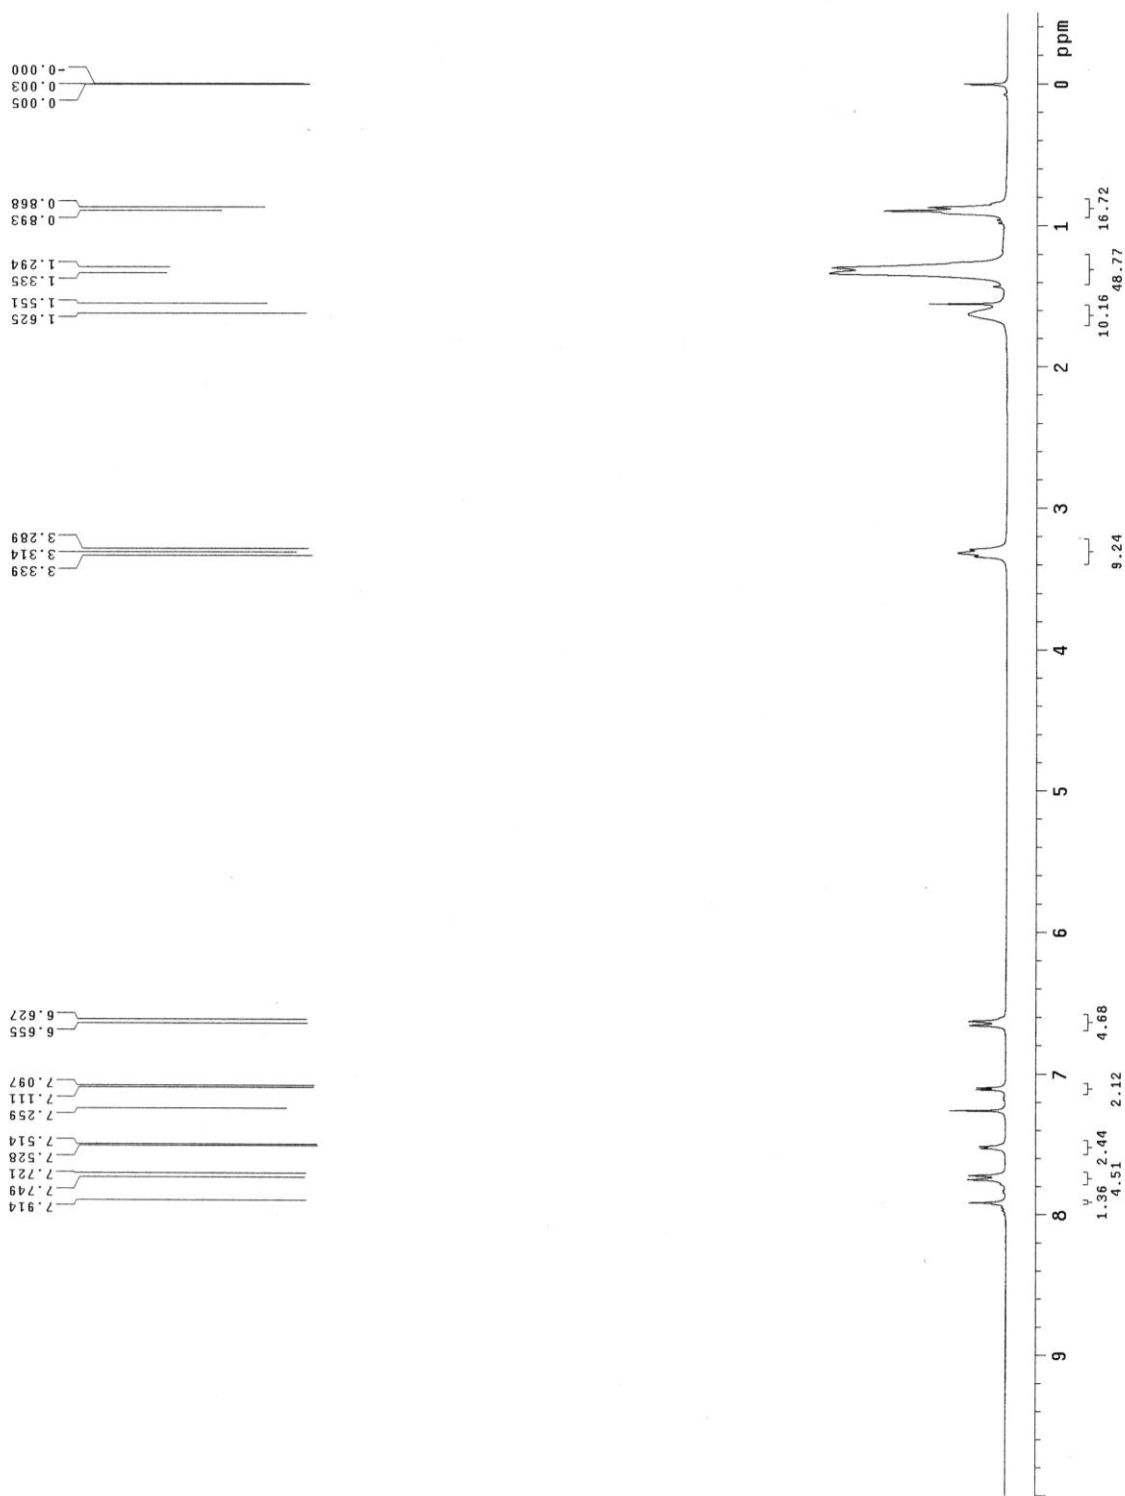

Figure S 7  $^1\text{H}$  NMR spectrum of

**2,3-bis(4-dioctylaminophenyl)-5,8-bis(5-bromothiophen-2-yl)quinoxaline (9)** in  $\text{CDCl}_3$

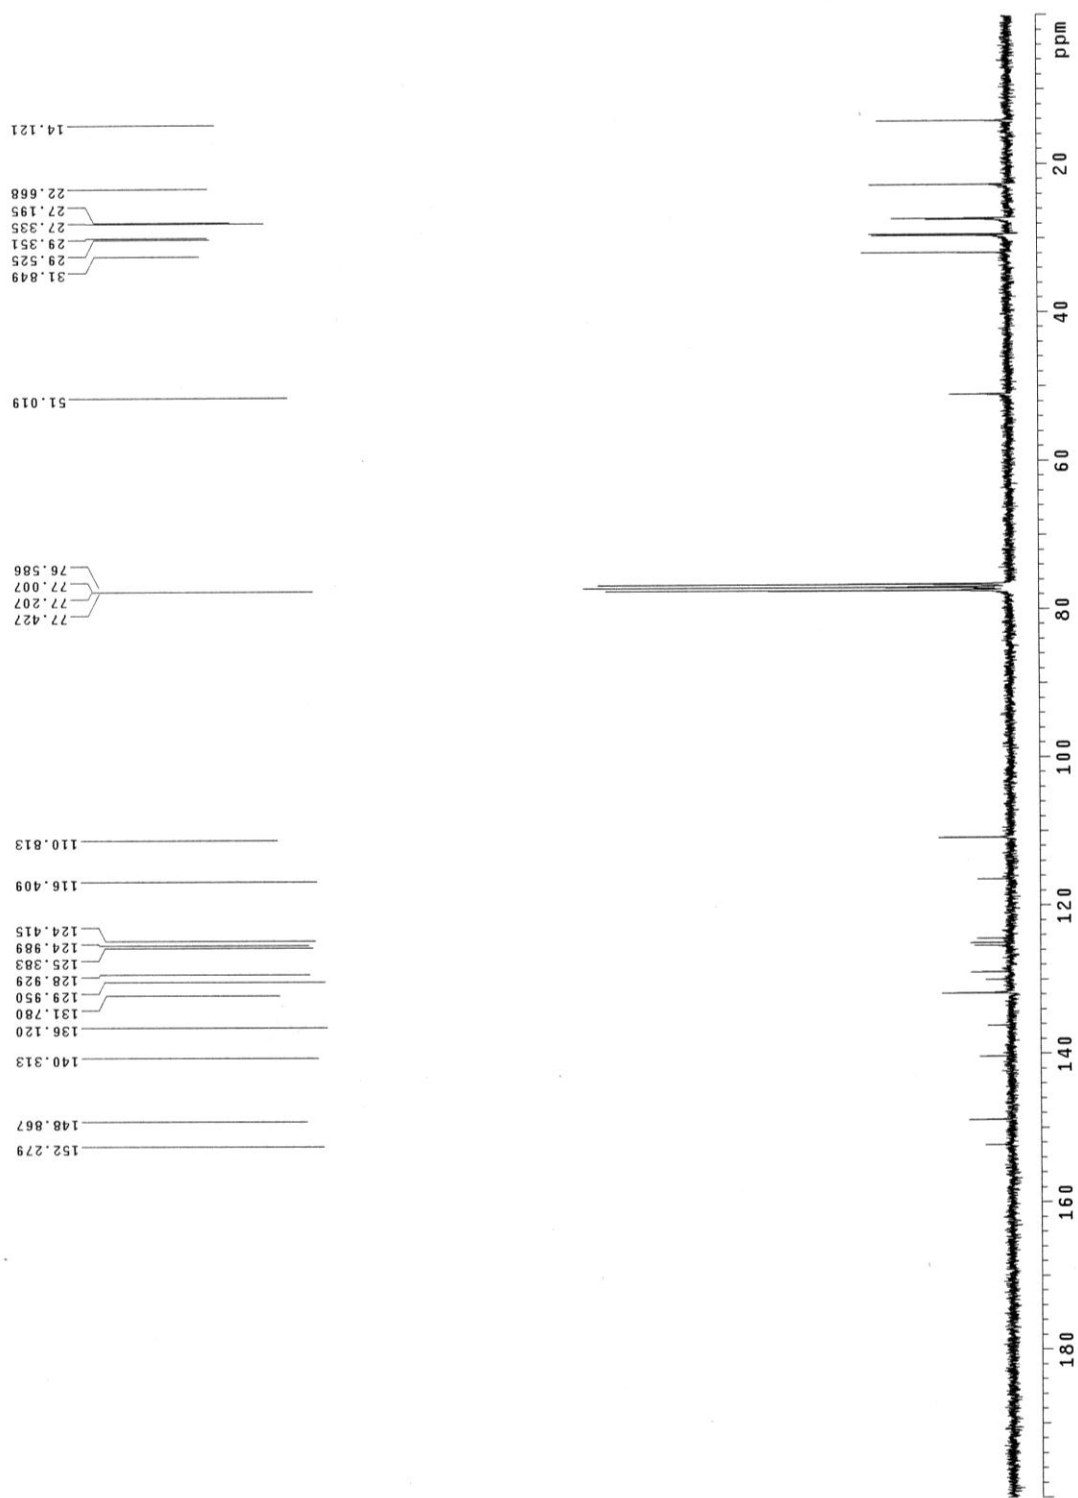

Figure S 8  $^{13}\text{C}$  NMR spectrum of

**2,3-bis(4-dioctylaminophenyl)-5,8-bis(5-bromothiophen-2-yl)quinoxaline (9)** in  $\text{CDCl}_3$

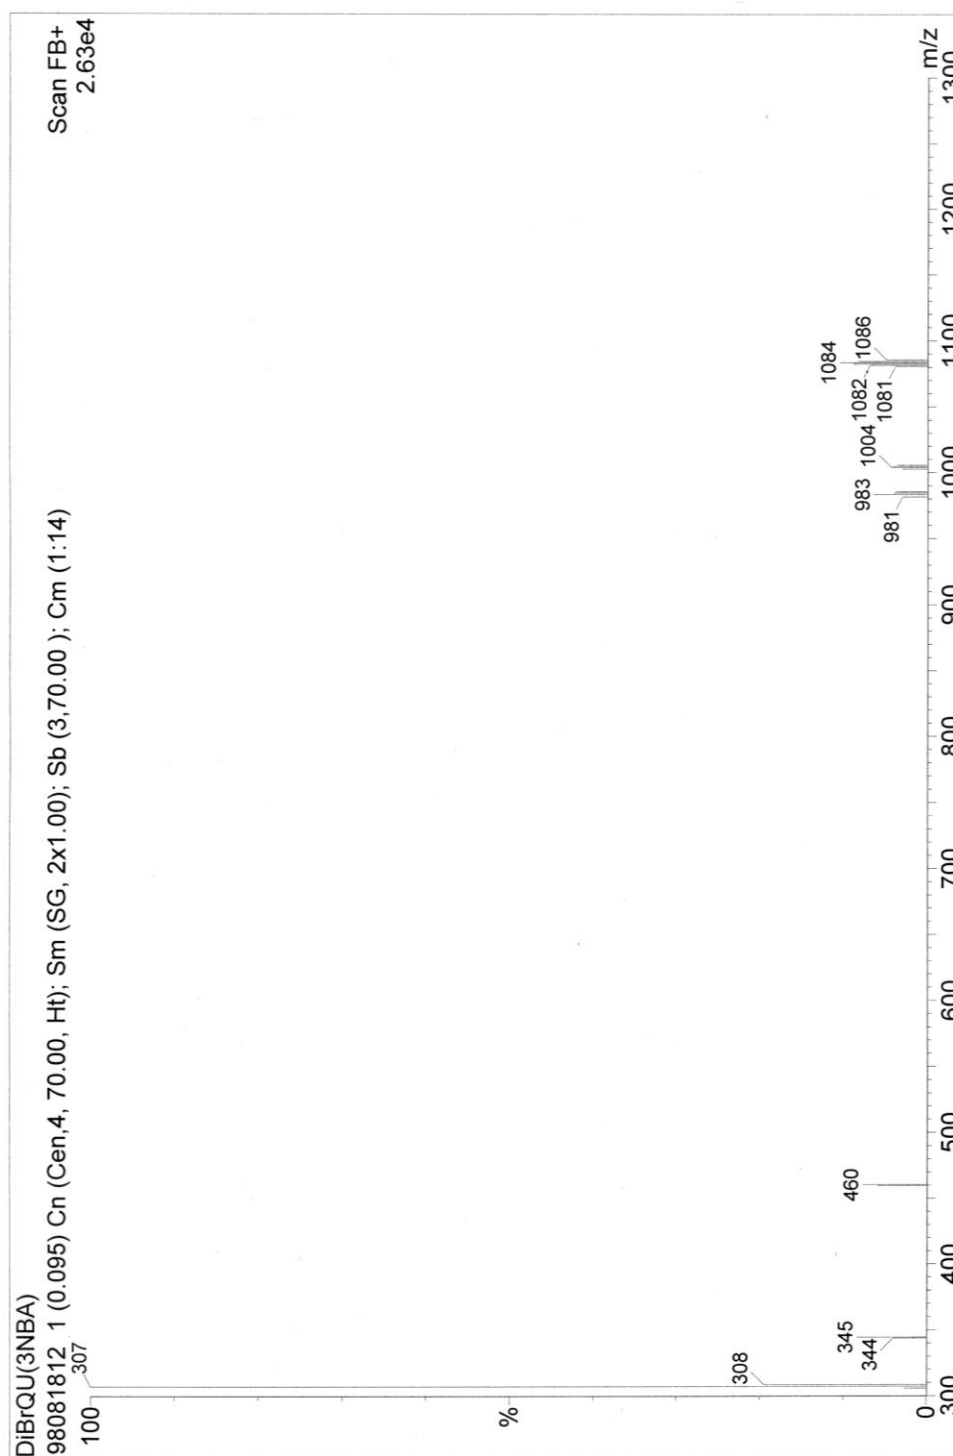

Figure S 9 FAB

spectrum

of

**2,3-bis(4-dioctylaminophenyl)-5,8-bis(5-bromothiophen-2-yl)quinoxaline (9)**

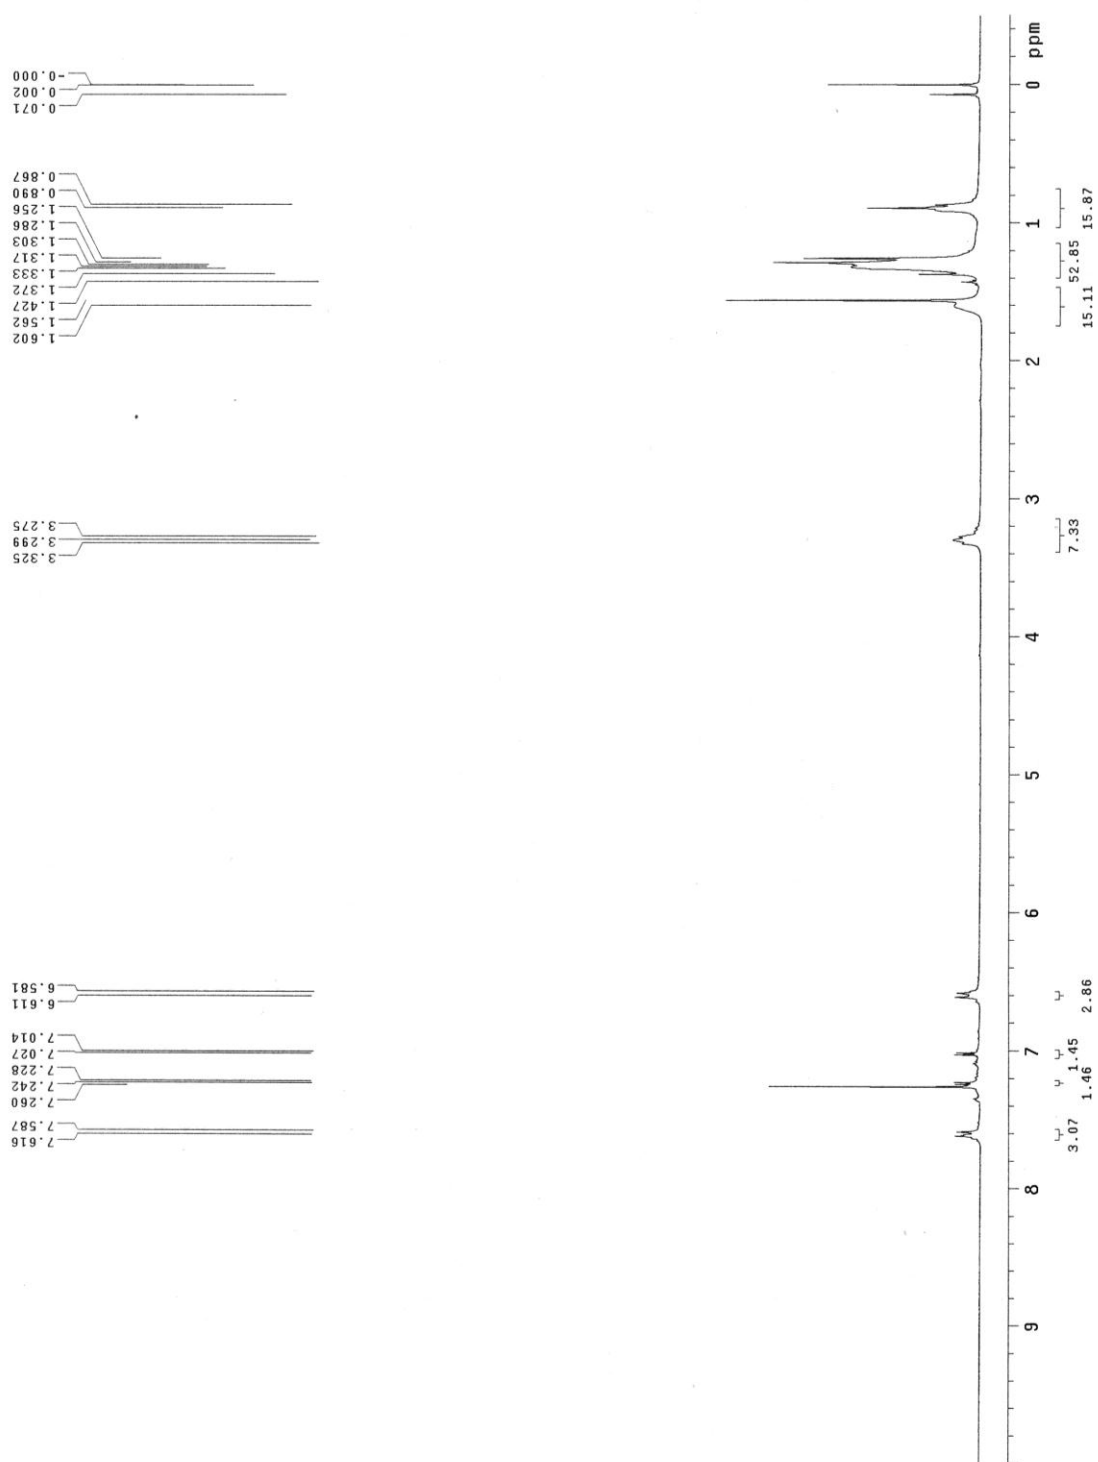

Figure S 10  $^1\text{H}$  NMR spectrum of

**2,3-bis(4-dioctylaminophenyl)-5,7-bis(5-bromothiophen-2-yl)thieno[3,4-*b*]pyrazine (14)** in  $\text{CDCl}_3$



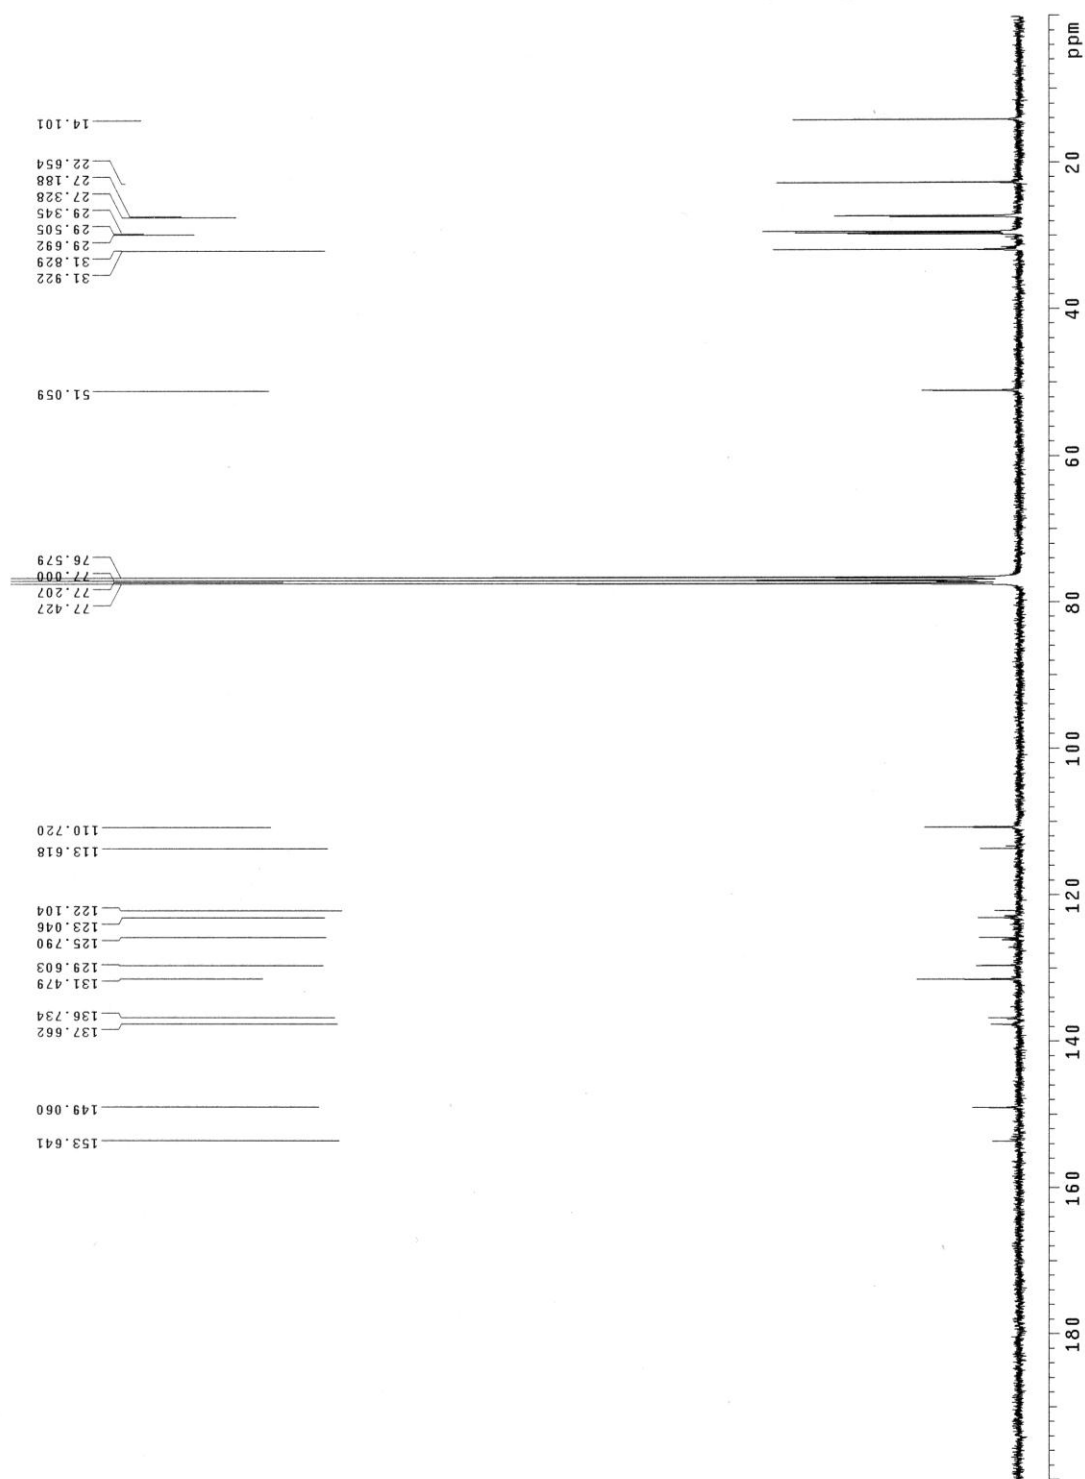

Figure S 11 <sup>13</sup>C NMR spectrum of

2,3-bis(4-dioctylaminophenyl)-5,7-bis(5-bromothiophen-2-yl)thieno[3,4-*b*]pyrazine (14) in CDCl<sub>3</sub>

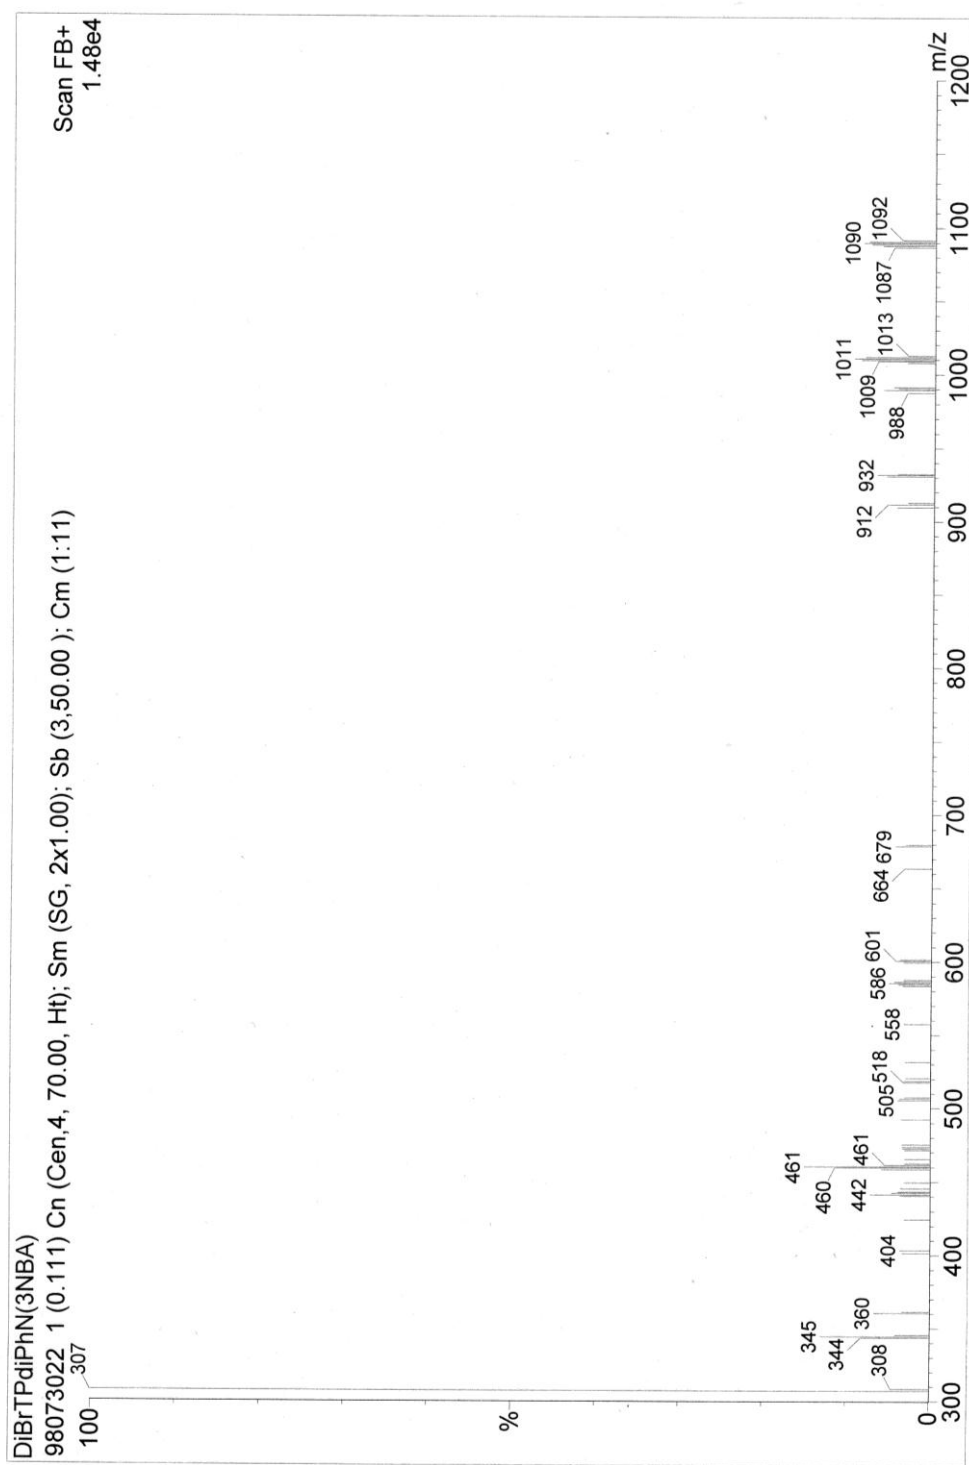

Figure S 12 FAB

spectrum

of

**2,3-bis(4-dioctylaminophenyl)-5,7-bis(5-bromothiophen-2-yl)thieno[3,4-*b*]pyrazine (14)**

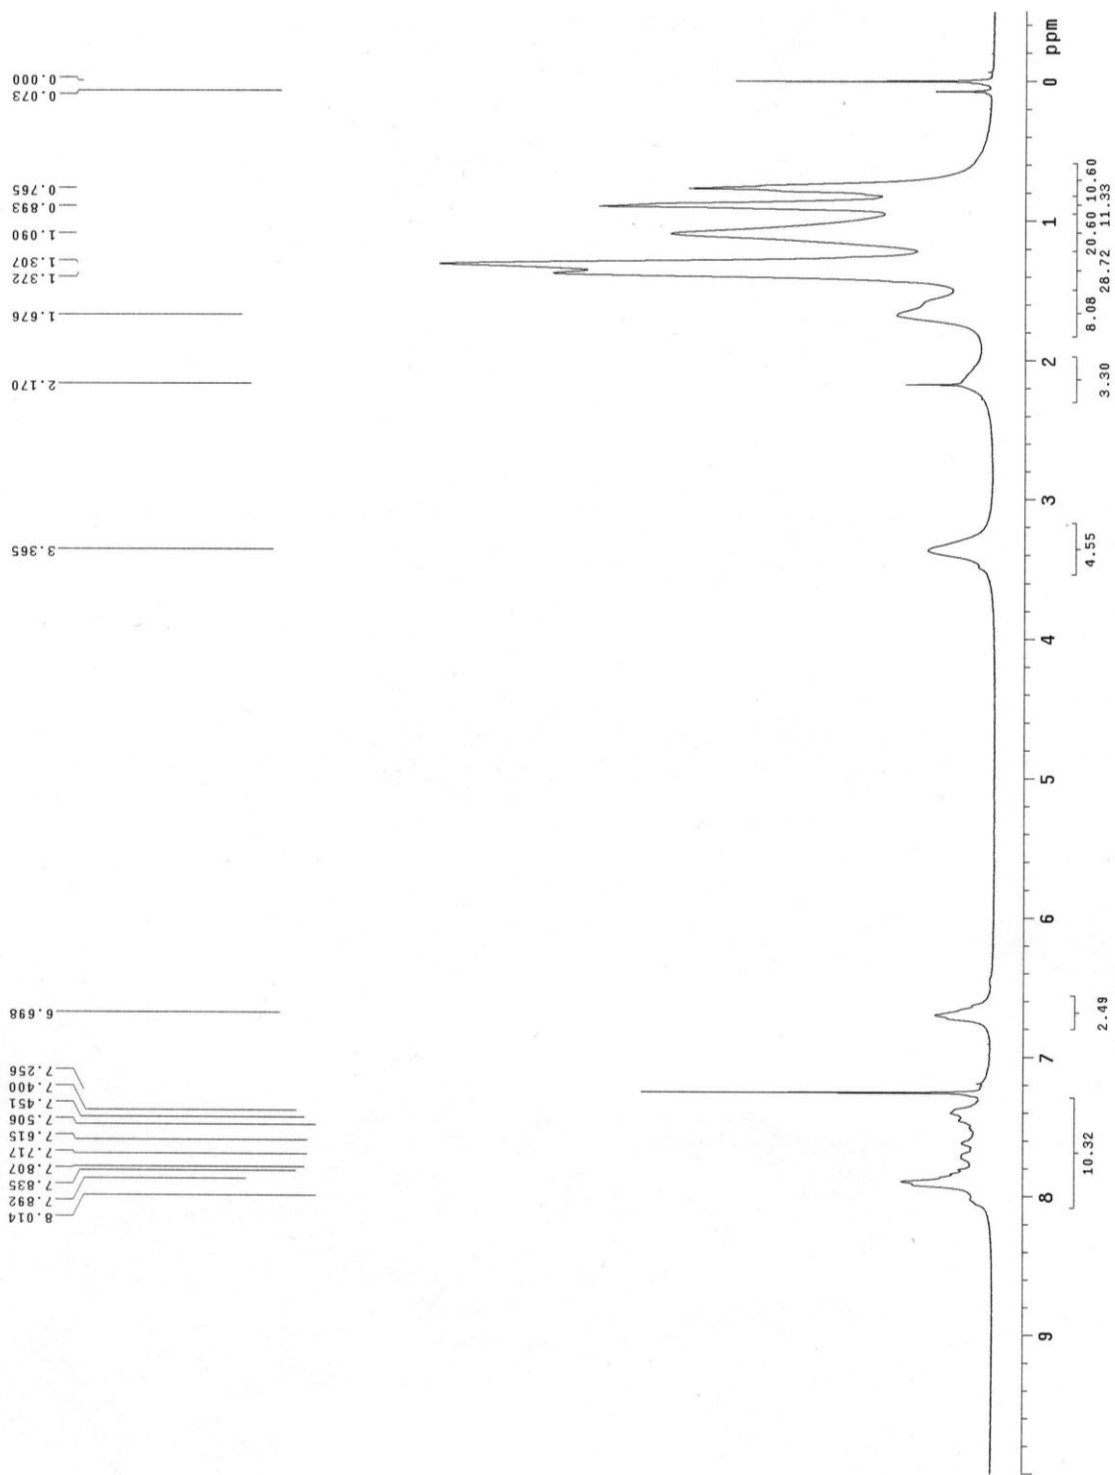

Figure S 13 <sup>1</sup>H NMR spectrum of PDIDTDOAQX in CDCl<sub>3</sub>

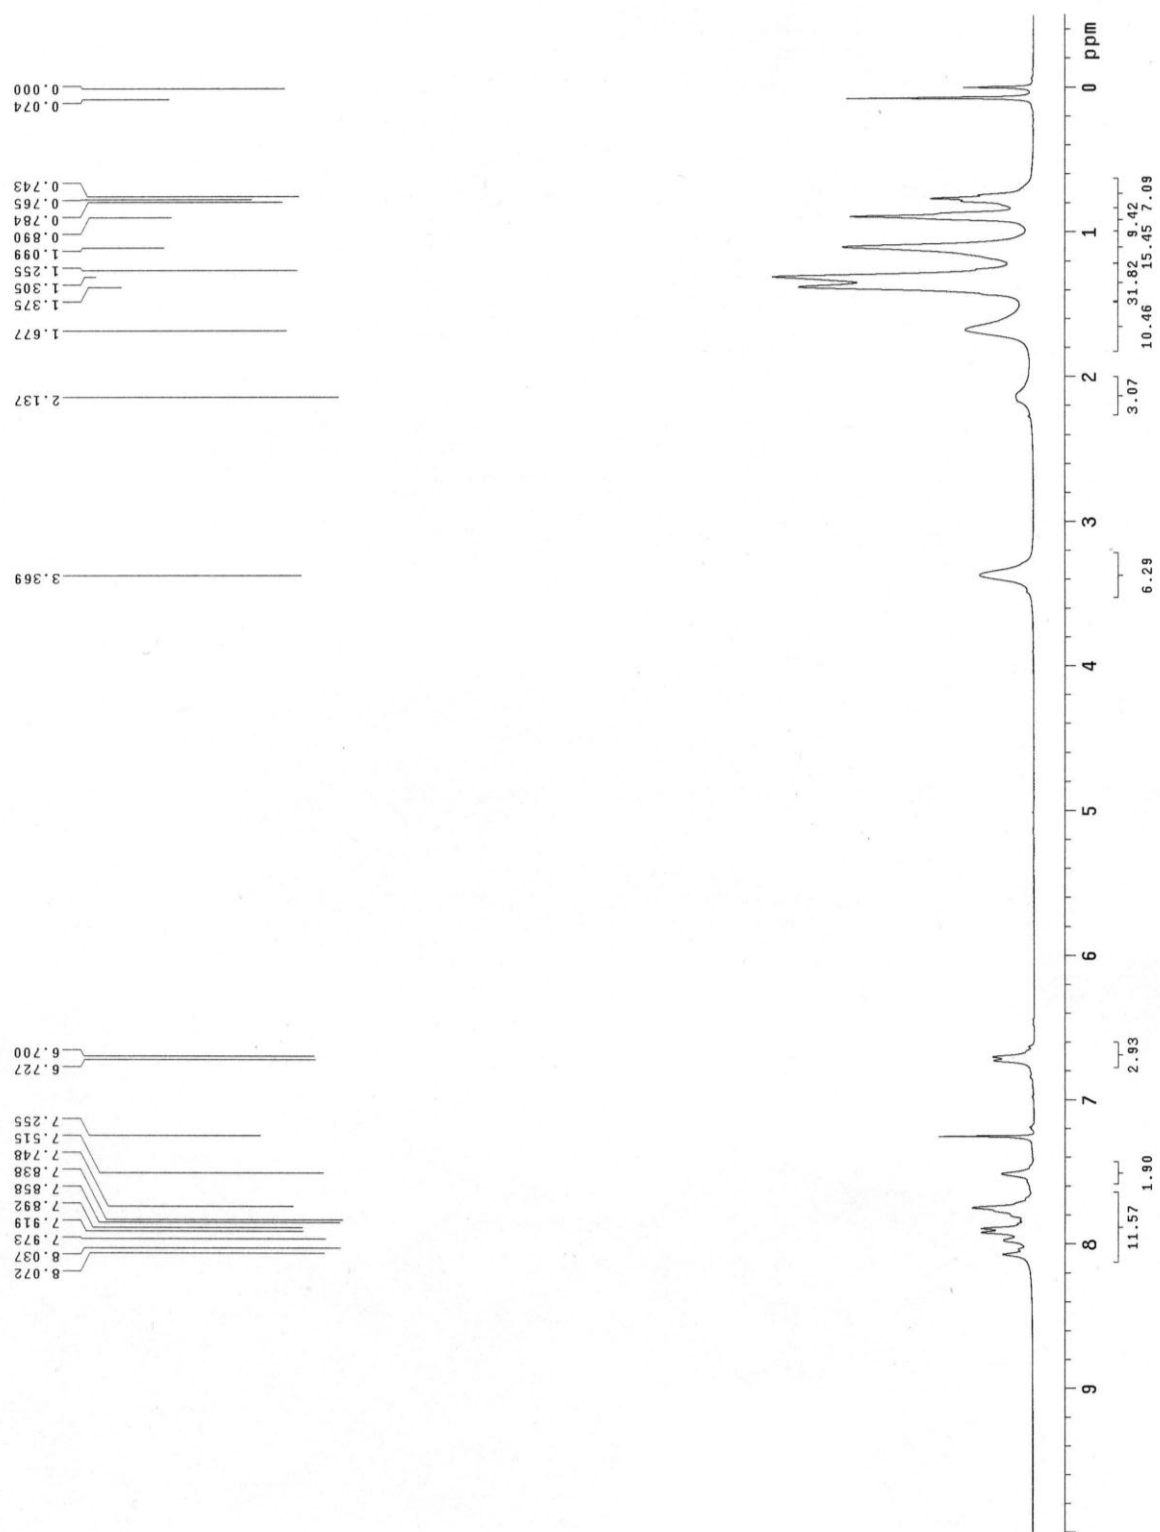

Figure S 14  $^1\text{H}$  NMR spectrum of **PFDOAQX** in  $\text{CDCl}_3$

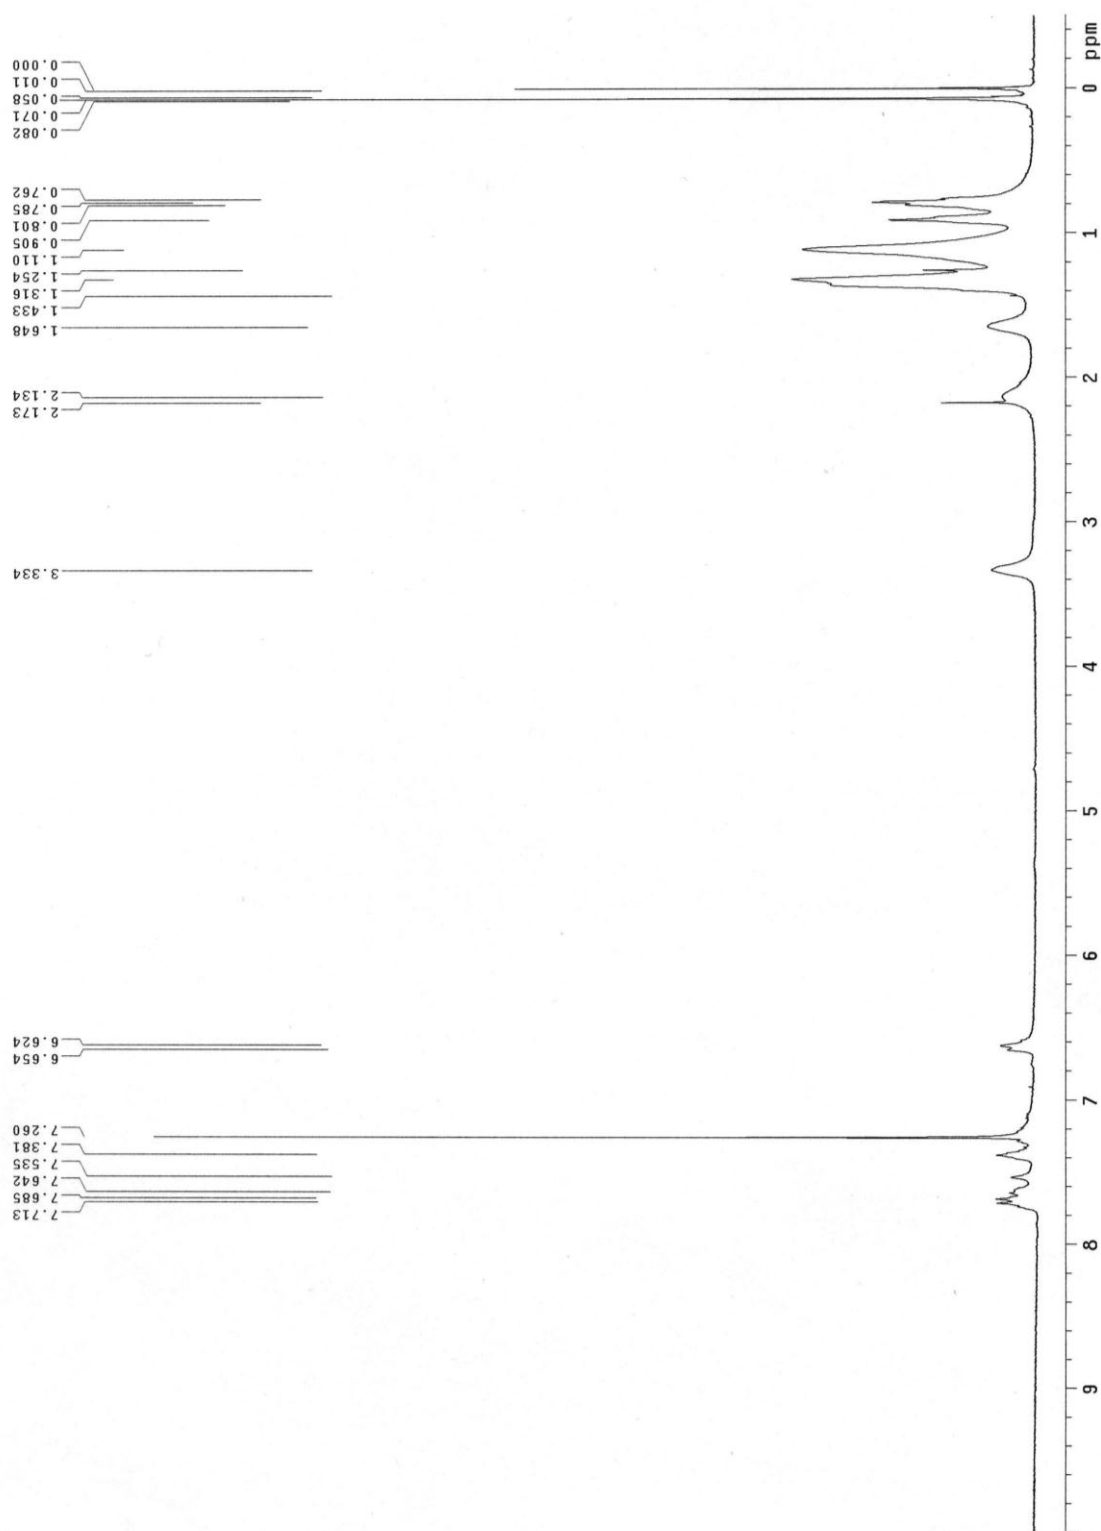

Figure S 15 <sup>1</sup>H NMR spectrum of PDIDTDOATP in CDCl<sub>3</sub>

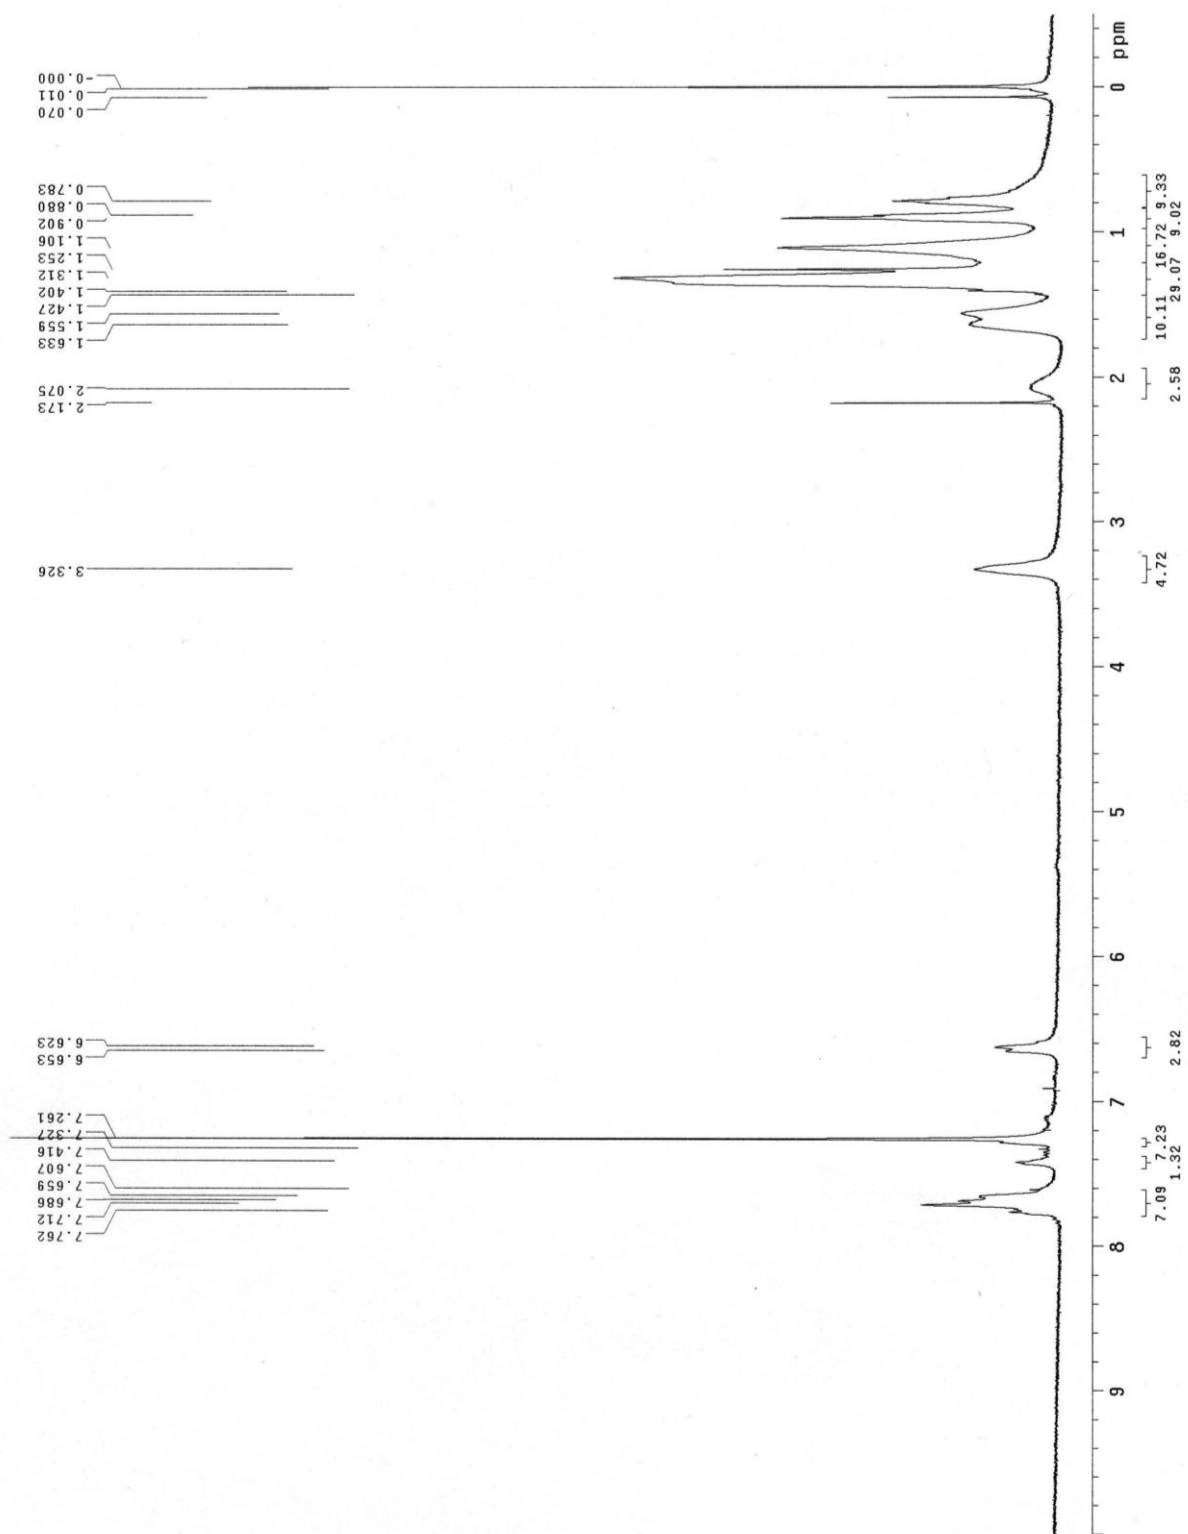

Figure S 16  $^1\text{H}$  NMR spectrum of PFDOATP in  $\text{CDCl}_3$

### 3. Reference

(1) Gaussian 09, Revision A.02, Frisch, M. J.; Trucks, G. W.; Schlegel, H. B.; Scuseria, G. E.; Robb, M. A.; Cheeseman, J. R.; Scalmani, G.; Barone, V.; Mennucci, B.; Petersson, G. A.; Nakatsuji, H.; Caricato, M.; Li, X.; Hratchian, H. P.; Izmaylov, A. F.; Bloino, J.; Zheng, G.; Sonnenberg, J. L.; Hada, M.; Ehara, M.; Toyota, K.; Fukuda, R.; Hasegawa, J.; Ishida, M.; Nakajima, T.; Honda, Y.; Kitao, O.; Nakai, H.; Vreven, T.; Montgomery, Jr., J. A.; Peralta, J. E.; Ogliaro, F.; Bearpark, M.; Heyd, J. J.; Brothers, E.; Kudin, K. N.; Staroverov, V. N.; Kobayashi, R.; Normand, J.; Raghavachari, K.; Rendell, A.; Burant, J. C.; Iyengar, S. S.; Tomasi, J.; Cossi, M.; Rega, N.; Millam, N. J.; Klene, M.; Knox, J. E.; Cross, J. B.; Bakken, V.; Adamo, C.; Jaramillo, J.; Gomperts, R.; Stratmann, R. E.; Yazyev, O.; Austin, A. J.; Cammi, R.; Pomelli, C.; Ochterski, J. W.; Martin, R. L.; Morokuma, K.; Zakrzewski, V. G.; Voth, G. A.; Salvador, P.; Dannenberg, J. J.; Dapprich, S.; Daniels, A. D.; Farkas, Ö.; Foresman, J. B.; Ortiz, J. V.; Cioslowski, J.; Fox, D. J. Gaussian, Inc., Wallingford CT, 2009.
